# **Metagenomic analysis reveals large potential for carbon, nitrogen and sulfur cycling in coastal methanic sediments of the Bothnian Sea**

Olivia Rasigraf<sup>1,2,\*§</sup>, Niels A.G.M. van Helmond<sup>3</sup>, Jeroen Frank<sup>1,4</sup>, Wytze K. Lenstra<sup>3</sup>, Matthias Egger<sup>3,#</sup>, Caroline P. Slomp<sup>2,3</sup>, Mike S.M. Jetten<sup>1,2,4</sup>

<sup>1</sup> Department of Microbiology, Radboud University Nijmegen, Nijmegen, The Netherlands

<sup>2</sup> Netherlands Earth System Science Centre (NESSC), Utrecht, The Netherlands

<sup>3</sup> Department of Earth Sciences, Utrecht University, The Netherlands

<sup>4</sup> Soehngen Institute of Anaerobic Microbiology (SIAM), Radboud University Nijmegen, Nijmegen, The Netherlands

\*current address: German Research Centre for Geosciences (GFZ), Section 3.7 Geomicrobiology, Potsdam, Germany

#current address: The Ocean Cleanup, Rotterdam, The Netherlands

§corresponding author: [olivia.rasigraf@gfz-potsdam.de](mailto:olivia.rasigraf@gfz-potsdam.de)

# Abstract

The Bothnian Sea is an oligotrophic brackish basin characterized by low salinity and high concentrations of reactive iron, methane and ammonium in the sediments potentially enabling an intricate microbial network. Therefore, we analyzed and compared biogeochemical and microbial profiles at one offshore and two near coastal sites in the Bothnian Sea. 16S rRNA amplicon sequence analysis revealed stratification of both bacterial and archaeal taxa in accordance with the geochemical gradients of iron, sulfate and methane. The communities at the two near coastal sites were more similar to each other than that at the offshore site located at a greater water depth. To obtain insights into the metabolic networks within the iron-rich methanic sediment layer located below the sulfate-methane transition zone (SMTZ), we performed metagenomic sequencing of sediment-derived DNA. Genome bins retrieved from the most abundant bacterial and archaeal community members revealed a broad potential for respiratory sulfur metabolism via partially reduced sulfur species. Nitrogen cycling was dominated by reductive processes via a truncated denitrification pathway encoded exclusively by bacterial lineages. Gene-centric fermentative metabolism analysis indicated the central role of acetate, formate, alcohols and hydrogen in the analyzed anaerobic sediment. Methanogenic/-trophic pathways were dominated by *Methanosaetaceae*, *Methanosarcinaceae*, *Methanomassiliicoccaceae*, *Methanoregulaceae* and ANME-2 archaea. *Thorarchaeota* and *Bathyarchaeota* encoded pathways for acetogenesis. Our results indicate flexible metabolic capabilities of core community bacterial and archaeal taxa, which can adapt to changing redox conditions, and with a spatial distribution in Bothnian Sea sediments that is likely governed by the quality of available organic substrates.

## Introduction

Sediment microbial communities drive biogeochemical cycles through their specific metabolic activities. The supply of organic carbon from primary production or terrestrial input via rivers, and electron acceptors such as nitrate ( $\text{NO}_3^-$ ) and sulfate ( $\text{SO}_4^{2-}$ ) in marine systems, will select for particular microbial guilds. Together they will determine the establishment of environment-specific metabolic networks and geochemical profiles. Despite the critical role of coastal sediments in global biogeochemical cycling, for example, as a source of methane ( $\text{CH}_4$ ) (Bange et al. 1994) and sink for nutrients (Asmala et al. 2017), our understanding of their microbial community composition and how this is linked to the cycling of sulfur (S), carbon (C) and nitrogen (N), is still incomplete.

The Bothnian Sea, a brackish basin located in the northern part of the Baltic Sea, is an ideal location to study the linkage between microbes and biogeochemistry because of the distinct sharp redox zonation of its surface sediments (Egger et al. 2015a; Lenstra et al. 2018; Rasigraf et al. 2017). The Bothnian Sea is oligotrophic and most organic matter in the sediment is supplied through rivers and is thus of terrestrial origin (Algesten et al. 2006).  $\text{SO}_4^{2-}$  concentrations in the bottom water are low (3-5 mM), which has allowed the development of a relatively shallow  $\text{SO}_4^{2-}$  reduction zone in the sediment at sites with relatively high sedimentation rates. At such sites,  $\text{CH}_4$  is abundant in the lower part of the  $\text{SO}_4^{2-}$  reduction zone, and a distinct sulfate-methane transition zone (SMTZ) has developed (Egger et al. 2015a; Lenstra et al. 2018). The exact position of the SMTZ varies with space and time depending on the sedimentation rate and the input of organic matter (Egger et al. 2015a; Lenstra et al. 2018; Rooze et al. 2016; Slomp et al. 2013). The input of reactive iron (oxyhydroxides, henceforth termed Fe oxides) is in general higher than sulfide

(H<sub>2</sub>S) formation in the sediment resulting in net burial of Fe oxides below the SMTZ. Both modeling and incubation studies suggest CH<sub>4</sub> oxidation with Fe oxides as the electron acceptor in the SO<sub>4</sub><sup>2-</sup>-depleted methanic layers below the SMTZ (Egger et al. 2015b; Rooze et al. 2016; Slomp et al. 2013). So far, the underlying pathways and responsible organisms for this process are largely unknown.

Several studies have investigated the microbial community composition in sediments of the Bothnian Bay and North Sea with 16S rRNA pyrosequencing techniques and speculated on possible microbial guilds involved in CH<sub>4</sub> and Fe cycling (Oni et al. 2015a; Reyes et al. 2016). In surface sediments from the Skagerrak and Bothnian Bay, various potential Fe-reducers belonging to *Desulfobulbaceae*, *Desulfuromonadaceae* and *Pelobacteraceae* families were identified (Reyes et al. 2016). In deeper methanic sediment layers of the Helgoland area in the North Sea, microbial populations predicted to be involved in Fe and CH<sub>4</sub> cycling included uncultured lineages of candidate division JS1 and methanogenic/-trophic archaea belonging to *Methanohalobium*, *Methanosaeta* and anaerobic methane oxidizing archaea clade 3 (ANME-3) (Oni et al. 2015a). Moreover, recent findings indicate that temperature is another factor which can influence the pathway of crystalline Fe utilization in these sediments (Aromokeye et al. 2018). Investigations of microbial communities involved in Fe cycling are challenging due to the absence of suitable ‘universal’ biomarkers. Different microbial groups have evolved different mechanisms and underlying genes encoding responsible enzymes may be unrelated. Novel mechanisms with unknown enzymatic steps in Fe reduction may exist but would remain undetected.

Activity measurements and functional biomarker analysis showed the presence of various pathways for N cycling in the Bothnian Sea and Bothnian Bay sediments (Bonaglia et al. 2017;

Hellemann et al. 2017; Rasigraf et al. 2017; Reyes et al. 2017). Thus, for example, dissimilatory nitrate reduction to ammonium (DNRA) and denitrification were shown to be of nearly equal importance in oligotrophic sediments at a coastal site in the Bothnian Bay (Bonaglia et al. 2017). These results contradict the common assumption that DNRA is of minor importance in oligotrophic sediments with low organic carbon input and low rates of H<sub>2</sub>S production. Also, a gene-centric approach for N-cycle potential was applied previously to the Bothnian Sea and Bothnian Bay sediments. Sediment from the surface layer, SMTZ and deep methanic zone were analyzed and showed that N cycling genes were most abundant in the surface layer with denitrification being potentially the dominant pathway for N loss (Rasigraf et al. 2017). Furthermore, in suboxic sediments from the Bothnian Bay, the genetic potential for denitrification was far greater than that for DNRA (Reyes et al. 2017). With respect to the nitrification potential, differences were found between analyzed sites in the Bothnian Sea and Bothnian Bay. While in the central part of the Bothnian Sea, the nitrification potential was almost exclusively attributed to ammonia oxidizing archaea (AOA) belonging to *Thaumarchaeota* Marine Group-I (MG-I) (Rasigraf et al. 2017), in suboxic coastal sediments in the Bothnian Bay, both AOA and ammonia oxidizing bacteria (AOB) seemed equally important (Reyes et al. 2017). Thus, large differences in measured activities and genetic inventory can occur between sediments in the same region. The environmental factors driving those differences are not well explored.

Here, we assessed the microbial community composition in sediments at three sites along a water depth gradient in the Bothnian Sea by various complementary approaches including 16S rRNA amplicon sequencing. Two sites are located near the coast in the Öre Estuary (N10 and NB8, Lenstra et al. 2018) while the third site is located in the central-basin of the Bothnian Sea (US5B, Egger et al. 2015a). Porewater profiles of key geochemical constituents such as SO<sub>4</sub><sup>2-</sup>, dissolved

Fe and CH<sub>4</sub> were used to determine the redox zonation. In addition to community comparisons between sites, we examined the core microbial community and its metabolic potential in the ferruginous methanic zone at one of the coastal sites through metagenome sequencing. Several high quality metagenome-assembled genomes (MAGs) were recovered for abundant microbial community members. Analysis of the MAGs indicated a flexible metabolic network with a strong potential for fermentation and S cycling.

## Materials and Methods

### Sampling and geochemical analysis

The two near-coastal sites, N10 and NB8 are located in the Öre Estuary in the Bothnian Sea at water depths of 21 and 33 m, respectively (Lenstra et al. 2018). Sediments at these sites were collected during a field campaign with R/V *Lotty* in August 2015 using a Gemini gravity corer (8 cm inner diameter). The offshore site US5B is located in the central basin of the Bothnian Sea at a water depth of 214 m and was sampled in August 2012 as described in Egger et al. 2015a. Sediments at this site were collected during a field campaign with R/V *Aranda* in August 2012 using a GEMAX gravity corer (10 cm inner diameter). Locations of all sampled sites are shown in Figure 1. Porewater depth profiles of SO<sub>4</sub><sup>2-</sup>, CH<sub>4</sub>, NH<sub>4</sub><sup>+</sup>, H<sub>2</sub>S and dissolved Fe were measured either onboard or later in the laboratory as described previously (Egger et al. 2015a; Lenstra et al. 2018; Figure 2). Sediment characteristics of sampled sites are summarized in Table 1. Sediment cores were kept at 4°C in the dark covered with a water layer until slicing. The slicing of sediment cores was performed in an anaerobic chamber under argon atmosphere. Sediment subsamples dedicated for DNA isolation were stored at -20°C until further processing.

## **DNA isolation**

The frozen core sediment subsamples were defrosted on ice and vortexed to obtain homogenous slurry. Subsequently, 0.2-0.5ml of original sediment slurry was filled into a bead beating tube from the PowerSoil DNA isolation kit (MoBio, USA). Further isolation was performed according to manufacturer's instructions. The quantity of isolated DNA was assessed by NanoDrop 1000 (Thermo Scientific, USA) and Qubit<sup>®</sup> 2.0 (Invitrogen, Life Technologies, Carlsbad, USA). After isolation, DNA was frozen at -20°C until further use.

## **16S rRNA and metagenome sequencing**

The amplification of total archaeal and bacterial 16S rRNA genes was performed with the following primer pairs: Arch349F (5'-GYGCASCAGKCGMGAAW30 ) (Takai and Horikoshi 2000) and Arch806R (5'-GGACTACVSGGGTATCTAAT-3') (Takai and Horikoshi 2000) for archaea, Bac341F (5'-CCTACGGGNGGCWGCAG-3') (Herlemann et al. 2011) and Bac806R (5'-GGACTACHVGGGTWTCTAAT-3') (Caporaso et al. 2012) for bacteria. 16S rRNA amplicon sequencing was performed on the Illumina MiSeq platform using the MiSeq Reagent Kit v3, yielding 2x300bp paired-end reads (Macrogen Inc., Europe).

For metagenomic sequencing, DNA from separate depth samples was pooled in equimolar concentrations. Paired-end metagenomic sequencing with 2x300bp sequence chemistry was performed with Miseq reagent kit v3 on Illumina Miseq platform (San Diego, California, USA) according to manufacturer's instructions at the Microbiology Department of Radboud University, Nijmegen.

## **16S rRNA gene amplicon analysis**

Paired end reads were processed with the Mothur v.1.36.1 software following the standard operation procedure (MySeq SOP) instructions (Kozich et al. 2013). The length of overlapped sequences was filtered for 400-500 base pairs (bp). Chimeric sequences were removed with the UCHIME algorithm (Edgar et al. 2011). Sequences were clustered into operational taxonomic units (OTU) with a 97% identity cut-off and classified using the SILVA 16S rRNA gene non-redundant reference database (version 123, SSURef123NR99) and the Bayesian classifier ('wang') (Pruesse et al. 2007). After quality trimming, chimera removal and normalization ("subsampling" in Mothur) of data, each sample contained 5,000 sequences for bacteria and 2,000 sequences for archaea. Samples with fewer sequences were excluded from the analysis. Statistical analysis was performed in R (<https://www.r-project.org/>) (R Development Core Team, 2013) with OTU tables obtained in Mothur using the package Vegan (Oksanen et al. 2018). Data visualization was performed in Rstudio (RStudio Team 2015) using the package ggplot2 (Wickham 2016). The R package "OTUtable" was used to merge identical taxonomic groups classified as different OTUs in Mothur (Linz et al. 2017).

# **Metagenome analysis: assembly, binning, annotation**

Sequencing data obtained from the sediment sample described in this study were analyzed together with data obtained from incubation samples which are part of another study (data not shown).

Quality-trimming, sequencing adapter removal and contaminant filtering of Illumina paired-end sequencing reads was performed using BBduk (BBTools suite version 37.17) (Bushnell), yielding 97,703,456 reads. Processed reads were co-assembled using MEGAHIT v1.1.1-2 (Li et al. 2015; Li et al. 2016) using the "meta-sensitive" preset. MEGAHIT iteratively assembled the metagenome using k-mers of length 21, 29, 39, 59, 79, 99, 119, 141. Reads were mapped back to

the assembled metagenome for each sample separately using Burrows-Wheeler Aligner 0.7.15 (Li and Durbin 2010) (BWA), employing the “mem” algorithm. The sequence mapping files were processed using SAMtools 1.6 (Li et al. 2009). Metagenome binning was performed for contigs greater than 2,000 bp. To optimize binning results, four different binning algorithms were used: COCACOLA (Lu et al. 2017), CONCOCT (Alneberg et al. 2014), MaxBin 2.0 2.2.3 (Wu et al. 2016) and MetaBAT 2 2.10.2 (Kang et al. 2015). The four bin sets were supplied to DAS Tool 1.0 (Sieber et al. 2018) for consensus binning to obtain the final bins. The quality of the genome bins was assessed through a single-copy marker gene analysis using CheckM 1.0.7 (Parks et al. 2015). A coarse taxonomic classification of the genome bins was performed using CheckM and further refined by placing bins in a phylogenetic tree using the UBCG pipeline for phylogenomic tree reconstruction (Na et al. 2018). Annotation and biomarker detection was performed with KEGG automatic annotation server with bit score threshold of 100 (Moriya et al. 2007) and the Microbial Annotation and Analysis Platform of MicroScope (MAGE) (Vallenet et al. 2006). All sequencing data obtained for this project were submitted to the GenBank under the BioProject PRJNA511814. The metagenome originating from the in situ sediment in the methanic Fe-rich zone at site NB8 described in this study is designated as sample BS5 (BioSample SAMN10644131).

## **Metagenome analysis: *mcrA* biomarker analysis**

Functional biomarker analysis was performed as described previously (Lüke et al. 2016; Rasigraf et al. 2017). Following the procedures described in Lüke et al. 2017, metagenome data for the in situ sediment sample were quality trimmed with CLC Genomics Workbench 9.5.3 software using the following settings: quality score limit 0.01 (Q20), maximum number of ambiguous base pairs 0, min read length 100 [nt]. Metagenome size comprised 18,107,912 reads after quality trimming.

Functional biomarkers were identified with blastx (release 2.4.0) using manually curated functional gene databases following the procedure described previously. Amino acid sequence data were aligned in ARB (Ludwig et al. 2004) and used for building an alternative classification taxonomy in MEGAN 5.11.3 based on manually curated *mcrA* gene database (Huson et al. 2007). Curated functional gene reads were re-blasted with a database file adapted for alternative taxonomic classification in MEGAN. Blast output was then imported into MEGAN and visualized for quantitative analysis. In total 288 *mcrA* gene reads were extracted from the metagenome. Quantified data were visualized with the R statistical package ggplot2. For quantitative comparison, the analyzed gene reads were normalized to metagenome size and average gene length according to the following formula: normalized read count = (gene read count\*1,000,000,000)/(total metagenome read count\*average gene length [nt]). For SSU rRNA quantification, raw reads were mapped to SILVA database (release 128) in CLC Genomics Workbench with the following settings: match score 1, mismatch cost 2, insertion cost 3, deletion cost 3, length fraction 0.5, similarity fraction 0.8. Mapped reads were extracted and submitted to SILVAngs online analysis pipeline ([www.arb-silva.de/ngs/](http://www.arb-silva.de/ngs/)).

## Results and Discussion

### Geochemistry of sites N10, NB8 and US5B

Porewater profiles revealed the presence of a shallow SMTZ at all three sites (Figure 2). At site N10, the SMTZ is located at a depth of about 25-35 cm. At this site, CH<sub>4</sub> and H<sub>2</sub>S concentrations in the porewater were very low. At sites NB8 and US5B, in contrast, the SMTZ was located at depths of about 20-25 cm and 4-9 cm, respectively, and distinct maxima in H<sub>2</sub>S was observed within the SMTZ. Maximum concentrations of NH<sub>4</sub><sup>+</sup> at depth in the sediment ranged from about

0.5 mM at site N10 to 1.5 and 3.0 mM at sites NB8 and US5B, respectively. All sediments were rich in dissolved  $\text{Fe}^{2+}$ , with concentrations increasing in the sequence N10, NB8 and US5B below the SMTZ (Figure 2). This spatial trend was in accordance with the observed 10-fold increase in sediment accumulation rates and corresponding increased input of organic matter with distance from the coast.

### **Sediment microbial diversity in the Bothnian Sea**

Bothnian Sea vertical sediment profiles were analyzed for their bacterial and archaeal populations at sites N10, NB8 and US5B. Results are presented in Figures 3 and 4.

### **Archaeal 16S rRNA gene distribution in the Bothnian Sea sediments**

The vertical distribution of archaeal 16S rRNA gene sequences at all three sites over the sediment profile is shown in Figure 3. The results revealed that archaeal communities were more similar between the neighboring coastal sites N10 and NB8, than to the offshore site US5B. Despite the very similar geochemical profiles at sites NB8 and US5B, the communities were significantly different. Non-metric multidimensional scaling (nMDS) analysis performed on the archaeal species abundances from all sites revealed a clear separation as seen in Figure 5 (B).

At all sites, upper sediment microbial communities were distinct from the ones at greater depth. This shift in relative species abundances could be explained by the rapid decrease in available electron acceptors, in particular  $\text{SO}_4^{2-}$ , and the increase of dissolved Fe and  $\text{CH}_4$  with depth. When comparing the archaeal community at different depths in the sediment, a similarity was observed for the upper sediment layer (4-18 cm) of site NB8 with the total profile of site N10.

Since the upper sediment layer of site NB8 was characterized by a similar geochemistry as the whole profile of site N10, the observed similarity might indicate that the local microbial community was adapted to the prevailing environmental conditions.

At all sites, the upper  $\text{SO}_4^{2-}$  containing sediment zone was dominated by *Thaumarchaeota* Marine Group-I (MG-I). Although their relative abundance decreased with depth, they still could be detected throughout the whole sediment profile at each site. MG-I have previously been shown to be ubiquitous in terrestrial and marine environments in which they are assumed to be involved in aerobic ammonia oxidation (Pester et al. 2011). However, several recent studies have detected genetic signatures of MG-I in deeper anaerobic sediment layers where an aerobic lifestyle is not likely (Rasigraf et al. 2017; and references therein). Some members of MG-I have been shown to use organic N compounds for growth, without possessing the aerobic ammonia oxidizing enzyme complex and the ability for ammonia oxidation (Weber et al. 2015).

Methanotrophic archaea assigned to the ANME-2a/b clade were the most dominant community member of *Euryarchaeota* and were detected at all analyzed sites. No other ANME clades could be detected. Their relative abundance peaked at the putative SMTZ zone (characterized by measurable porewater sulfide content). Below the SMTZ, ANME 16S rRNA biomarker showed a more scattered distribution. The ANME-2a/b archaeal clade has been detected in many marine and brackish sediments, including different parts of the Baltic Sea (Treude et al. 2005). However, some studies have shown its preference for shallow sediment depths with low  $\text{CH}_4$  and  $\text{H}_2\text{S}$  concentrations (Roalkvam et al. 2012; Roalkvam et al. 2011). Such conditions are also found in the Bothnian Sea, where the salinity of the overlying water and  $\text{H}_2\text{S}$  concentrations in the sediments are relatively low. Despite their central role in sulfur cycling, ANME-2a have also been linked to the oxidation of  $\text{CH}_4$  in the absence of  $\text{SO}_4^{2-}$  by a direct electron transfer onto artificial shuttles (McGlynn et al. 2015; Scheller et al. 2016). Whether the Bothnian Sea ANME-2

organisms are able to use Fe oxides as an electron acceptor has not been shown so far. Previous research has indicated that Fe oxides stimulate CH<sub>4</sub> oxidation in methanic sediments at site US5B (Egger et al. 2015b).

Other abundant archaeal groups comprised *Bathyarchaeota*, *Woesearchaeota* and *Thaumarchaeota* Group C3 (G-C3). Both, *Bathyarchaeota* and *Thaumarchaeota* G-C3 were relatively less abundant at US5B ranging between 1-9% and 1-2% of total archaeal 16S rRNA gene reads, respectively. Both groups were most prevalent in sediment layers above the SMTZ at NB8 (11-26% of all archaeal 16S rRNA reads for *Bathyarchaeota* and 7-32% for *Thaumarchaeota* G-C3) and throughout the whole profile of N10 (11-33% for *Bathyarchaeota* and 13-29% for *Thaumarchaeota* G-C3). Differences in sedimentation rates and quality of deposited organic matter which would differ between coastal and offshore sites, would both affect the degradation dynamics and intermediary metabolites. Thus, the prevalence of both groups could reflect the quality of degradable/fermentable organic matter in the same ecosystem such as the Bothnian Sea. For *Bathyarchaeota* several MAGs have been analyzed recently. Some studies found genomic indications for possible methylotrophic methanogenesis or anaerobic methanotrophy (Evans et al. 2015; Harris et al. 2018), others speculated on involvement in detrital protein degradation, fermentative acetate production and no capacity for methanogenesis (He et al. 2016; Lazar et al. 2016; Lloyd et al. 2013). *Thaumarchaeota* G-C3 16S rRNA gene sequences have been detected previously in a variety of terrestrial and marine environments (Hugoni et al. 2015; Na et al. 2015; Zeng et al. 2017). Their role remains somehow enigmatic since no enrichments or genomic sequences are available yet. Some members have been shown, however, to be involved in acetate consumption in SO<sub>4</sub><sup>2-</sup>-reducing marine and estuarine sediments (Na et al. 2015; Webster et al. 2010).

At all sites, a significant fraction of archaeal reads could not be classified based on the database we used (SILVA release 123). For the deeper layers of US5B, this fraction ranged from 2 to 22% of the total archaeal 16S rRNA gene reads. However, the analysis of MAGs obtained from the methanic zone from site NB8 indicated that at least part of those unclassified archaea belonged to the newly described phyla *Thorarchaeota* and *Lokiarchaeota*. Based on the previously published results, *Thorarchaeota* have been discussed to be involved in acetate production and sulfur cycling by thiosulfate/elemental sulfur reduction (Seitz et al. 2016).

The distribution of *Woesearchaeota* at NB8 followed that of *Bathyarchaeota* and *Thaumarchaeota* G-C3. The highest relative abundance was observed above the SMTZ with 5-14% of total archaeal 16S rRNA gene reads. The abundance decreased below 1% max below the SMTZ. At US5B, the distribution of *Woesearchaeota* 16S rRNA gene reads was more even over the sediment depth profile with abundances ranging between 1-9% of total reads. At N10, *Woesearchaeota* were also more prevalent in the upper sediment layers above 8 cm with abundances reaching up to 16% of total reads, however they were also present throughout the whole core with 1-5% of total reads. The phylum *Woesearchaeota* was proposed in 2015 when first bins from environmental metagenomes were analyzed (Castelle et al. 2015). Small genomes and incomplete gene sets necessary for glycolysis, pentose phosphate pathway and pyruvate metabolism were discussed to be indicators for a symbiotic or parasitic lifestyle (Castelle et al. 2015). No woesearchaeal metagenomic bins could be retrieved from the analyzed depth at site NB8. This could be explained by a relatively low abundance of 16S RNA genes of *Woesearchaeota* in deeper layers of NB8 pointing to their low importance in those sediments.

Most abundant known methanogens from the phylum *Euryarchaeota* were represented by families *Methanosaetaceae*, *Methanosarcinaceae*, *Methanoregulaceae* and *Methanobacteriaceae*. The lowest proportional abundance of all methanogens was detected in

305 SMTZ sediment layers. *Methanosaetaceae* were more prevalent in deeper layers of all sediment  
306 profiles with lowest numbers detected at N10. Their relative abundance reached 4% of total  
307 archaeal reads at N10, 16% at US5B and 13% at NB8. *Methanosarcinaceae* were present at all  
308 sites, with lowest numbers at N10 (2% max of total archaeal reads). Their distribution below the  
309 SMTZ at NB8 was rather scattered ranging between 1-13% of total archaeal reads. Higher  
310 abundances of *Methanosarcinaceae* correlated with lower abundances of ANME reads. At US5B,  
311 the abundance of *Methanosarcinaceae* reads ranged between 1-6% and was the highest in the  
312 deepest analyzed depth at 52.5-55 cm. This depth was also characterized by the highest observed  
313 proportion of *Methanosaetaceae* gene reads. *Methanoregulaceae* were more prevalent in  
314 sediment layers below the SMTZ at both US5B and NB8. At N10, their distribution correlated  
315 well with that of *Methanosaetaceae*. Relative abundances of total archaeal reads reached 8% at  
316 US5B, 7% at NB8 and 11% at N10. The distribution of *Methanobacteriaceae* was opposite to  
317 that of other methanogens. Highest abundances were detected above the SMTZ at NB8 with 4%  
318 max of total archaeal reads. Below the SMTZ, the abundance never exceeded 1% of total  
319 archaeal reads. At US5B, *Methanobacteriaceae* reads were below 1% throughout the sediment  
320 core. Also at N10, the highest abundance with 6% of total archaeal reads was observed in the  
321 upper most layer of 4-5 cm. In the deeper profile of N10, their abundance did not exceed 1% of  
322 total reads. Previous research has shown that *Methanosaetaceae* methanogens are strict  
323 acetotrophs and adapted to low acetate concentrations (Jetten et al. 1992). Low concentrations  
324 would be indicative of either low production or high turnover of acetate in Bothnian Sea  
325 sediments. In contrast, *Methanosarcinaceae* methanogens are generalists by being able to utilize  
326 a variety of substrates for CH<sub>4</sub> production, but appear to possess lower affinities to acetate (Jetten  
327 et al. 1992; Liu and Whitman 2008). Both *Methanobacteriaceae* and *Methanoregulaceae* have  
328 been shown to mainly employ a hydrogenotrophic lifestyle with many species being able to use

formate (Imachi and Sakai 2015; Oren 2014). Some species from *Methanobacteriaceae* have been shown to use methanol with H<sub>2</sub> (Fricke et al. 2006). Beside acetate, H<sub>2</sub> is a major by-product of various fermentative processes and would be available to methanogens and other hydrogenotrophs in these sediments. Thus, the presence of all detected methanogens indicates a niche separation by availability of different substrates or/and fluctuations in acetate/H<sub>2</sub> concentrations.

### **Bacterial 16S rRNA gene distribution in the Bothnian Sea sediments**

Similar to the archaeal communities, the bacterial 16S rRNA gene distribution between the coastal and central basin was significantly different (Figure 4). Both, N10 and NB8 were more similar to each other than NB8 and US5B (nMDS, Figure 5 (A)).

Particularly, the top sediment layer revealed substantial differences between the sites. At US5B, an apparent population of aerobic CH<sub>4</sub> oxidizing bacteria (MOB) represented by *Methylococcaceae* was detected (6% of total bacterial reads). In contrast, this group was significantly lower in abundance at coastal sites with only few detected sequences. An enrichment of this group close to the sediment surface would point to a less efficient CH<sub>4</sub> removal in deeper anoxic layers at US5B, particularly the SMTZ where most of the CH<sub>4</sub> would be oxidized by ANME. CH<sub>4</sub> that is not consumed in the SMTZ diffuses towards the sediment surface and fuels aerobic methanotrophic communities. The absence of surface sediment MOB communities at the coastal sites could be a result of either more efficient removal within the SMTZ (NB8) or a lower production by methanogens in deeper layers as seen at site N10.

The genus *Spirochaetales* was relatively more abundant at US5B, reaching a contribution of 12% in the deeper part of the profile. At both coastal sites, the abundances did not exceed 4%. In contrast, at both coastal sites *Anaerolineales* and *Bacteroidetes\_VadinHA17* were relatively more

abundant than at US5B. All three groups, *Anaerolineales*, *Bacteroidetes\_VadinHA17* and *Spirochaetales* belong to an anaerobic core community involved in different fermentation pathways. The metabolic potential of *Anaerolineales*, reconstructed from several sequenced genomes and cultured representatives, points to a strictly anaerobic chemo-organotrophic lifestyle (Hug et al. 2013; Yamada et al. 2006). Members of the genus *Spirochaeta* have been shown previously to be an integral part of anoxic sediment communities (Breznak and Warnecke 2008; Shivani et al. 2015; and references therein). They are free-living, chemo-organotrophic facultative or obligate anaerobes capable of production of various fermentation products including acetate, ethanol, H<sub>2</sub> and CO<sub>2</sub> (Breznak and Warnecke 2008; Miyazaki et al. 2014). *Bacteroidetes\_VadinHA17* is an abundant member of sediment communities and has been discussed to be involved in degradation of organic matter (Bolhuis et al. 2014; Harrison et al. 2016). The observed differences in abundance of these three groups indicated that organic metabolite flows are different between coastal and central-basin sediments and could probably be explained by the quality of organic matter.

Another significant group of 16S rRNA gene sequences detected at all sites in different proportions was assigned to *Xanthomonadales*. Their sequences were already detected in high abundance at site US5B in our previous study (Rasigraf et al. 2017) and they are here shown to be ubiquitous in the Bothnian Sea sediments among analyzed depths. Sequences belonging to *Xanthomonadales* have previously been observed to be abundant in marine and brackish sediments (Dyksma et al. 2016; Mußmann et al. 2017). Based on the genomic information, they have been predicted to play an important role in S and N cycles by employing either chemolithoautotrophic or -heterotrophic lifestyle (Mußmann et al. 2017). Thus, *Xanthomonadales* may be a major contributor to dark CO<sub>2</sub> fixation in marine sediments (Dyksma et al. 2016).

*Atribacteria* (formerly known as candidate divisions “OP9” and “JS1”) increased in relative abundance in the deeper part of the N10 sediment and reached up to 10% of the total bacterial 16S rRNA gene reads. At, NB8 and US5B, their abundance did not exceed 3% of total bacterial reads. *Atribacteria* have been shown previously to be abundant in anaerobic low energy environments (Newberry et al. 2004). Based on the available genome information, they appear to perform either primary fermentation, secondary fermentation or syntrophy for catabolism (Carr et al. 2015; Nobu et al. 2016). Their sequences have also been detected in Fe- and CH<sub>4</sub>-rich marine sediments of the Helgoland area in the North Sea (Oni et al. 2015a). There, their abundance strongly correlated with concentrations of dissolved Fe and CH<sub>4</sub>, and their possible involvement in Fe-dependent AOM together with members of *Methanosaetaceae* and the ANME-3 clade was suggested (Oni et al. 2015a). Other studies have also reported a regular occurrence of *Atribacteria* in sediments dominated by SO<sub>4</sub><sup>2-</sup>-dependent AOM (Harrison et al. 2009). Carr et al. 2015 identified a strong correlation between dissolved CH<sub>4</sub> profiles and abundance of *Atribacteria* in Arctic marine sediments. The observed correlation was suggested to be based on metabolic co-operation with methanogens which would scavenge fermentation products of *Atribacteria*, primarily acetate (Carr et al. 2015). The conditions at site N10 seem to favor the presence of *Atribacteria* in contrast to putative *Spirochaetales* fermenters at site US5B.

*Desulfobacterales* were high in abundance at all sites. Members of *Desulfobacterales* include many characterized sulfate reducing bacteria (SRB) which use SO<sub>4</sub><sup>2-</sup> and other sulfur compounds as terminal electron acceptors and a variety of fermentation products as electron donors (Pfennig et al. 1981). At NB8 and US5B, a top to bottom gradient could be observed with highest abundances coinciding with the SMTZ. At N10, no apparent gradient could be observed and their 16S rRNA genes were distributed rather evenly over the whole sediment profile. At this site the SO<sub>4</sub><sup>2-</sup> penetration depth is also deeper than at NB8 and US5B (Figure 2). *Desulfobacterales* are

often detected in marine sediments where  $\text{SO}_4^{2-}$  and  $\text{CH}_4$  are present (Leloup et al. 2007; Ruff et al. 2015). Some members of the *Desulfobacterales* are frequently observed partners in ANME/SRB consortia, where they perform  $\text{SO}_4^{2-}$  reduction and scavenge the reducing equivalents from ANME (Schreiber et al. 2010). Different ANME clades prefer certain SRB groups as partners, and it has been shown previously that ANME-2a are often detected together with SEEP-SRB1a – a clade belonging to *Desulfobacterales* (Schreiber et al. 2010). Our results are in line with previously published studies as the dominant ANME clade observed so far at all sites in the Bothnian Sea sediment belonged to ANME-2a. As expected, their highest abundance was observed in the zone where  $\text{SO}_4^{2-}$  was detectable and where  $\text{SO}_4^{2-}$  reduction was expected to occur. However, despite  $\text{SO}_4^{2-}$  being under the detection limit (75  $\mu\text{M}$ ) below the SMTZ at NB8 and US5B, a zone where Fe-dependent  $\text{CH}_4$  oxidation was postulated to occur (Egger et al. 2015b), the presence of SRB was indicative of either a presence of a high flux of oxidized S-species or SRB performing other types of metabolisms (e.g. fermentation). Previous research has shown that SRB can switch from the respiratory metabolism to fermentation when suitable electron acceptors are not available (Plugge et al. 2011). In such situation, a cooperation with  $\text{H}_2$ -scavenging methanogens is feasible (Plugge et al. 2011). Thus, a sudden introduction of  $\text{SO}_4^{2-}$  could potentially activate their  $\text{SO}_4^{2-}$  metabolism.

*Verrucomicrobiales* was abundant at both coastal sites but not in the central basin site US5B. Its distribution showed a strong gradient with highest numbers (up to 11% at NB8) near the sediment-water interface and a rapid decline within the sediment column. This change with depth points to an adaptation to high redox potential and possibly an aerobic/denitrifying lifestyle of dominant members making up the bulk of detected *Verrucomicrobiales* sequences. *Verrucomicrobia* have been previously shown to be abundant in marine water columns and sediments and to be mostly involved in polysaccharide degradation (Cardman et al. 2014;

Martinez-Garcia et al. 2012). A similar distribution of *Verrucomicrobia* sequences was observed previously and was linked to degradation of fresh algal biomass in surface sediments of the North Sea (Oni et al. 2015b). Thus, based on previously available data, *Verrucomicrobiales* would belong to a community of primary degraders and possibly provide substrates for anaerobic fermentative communities.

Sequences belonging to *Flavobacteriales* were detected in high abundance at all sites. Highest abundances were observed within the  $\text{SO}_4^{2-}$  penetration zone and SMTZ, similar to that of *Desulfobacterales*. At NB8, their abundance reached 10% of total bacterial reads within the SMTZ. At N10, their numbers slightly declined from top to bottom of the core with depth in the sediment, but did not exceed the maximum of 6%. Interestingly, at US5B, the *Flavobacteriales* sequence distribution initially followed that of both coastal sites with higher numbers at the top (6%) and declining towards 2% below the SMTZ, but the relative abundance started to increase again at the bottom of the sediment profile reaching up to 10% in the lowest analyzed depth of 52.5-55 cm. Interestingly, members of the *Flavobacteriales* were detected previously in an anaerobic methanotrophic enrichment originating from marine sediments (Jagersma et al. 2009). In active AOM cultures dominated by an ANME-2a archaeon, *Flavobacteriales* and *Desulfobacterales* together made up the bulk of the total bacterial sequences (Jagersma et al. 2009). Their metabolic role in that enrichment culture remained unclear, and possible involvement in S-compound transformations was discussed (Jagersma et al. 2009).

Another abundant group of bacteria detected at NB8 was assigned to the *Planctomycetales*. Their sequence abundance reached 6% and remained fairly constant throughout the sediment profile by minor variations between 3-6%. At N10, highest percentages of the total community were observed in the top 3 cm (6-7%), below which the population stayed at ca. 3% of the total bacterial reads. By further zooming in to a genus level, most reads were found to be assigned to

the *Blastopirellula*, *Rhodopirellula*, *Bythopirellula* and Pir4\_lineage. Some members of these lineages have been previously detected, described and isolated from Fe- and CH<sub>4</sub>-rich marine sediments (Storesund and Øvreås 2013; Winkelmann et al. 2010). They were shown to be involved in sugars and complex carbohydrate degradation, some were speculated to be involved in either Fe- or CH<sub>4</sub> oxidation (Storesund and Øvreås 2013). Thus, the most abundant *Planctomycetales* residing in the Bothnian Sea sediment are most likely involved in the hydrolysis and degradation of complex organic matter.

#### **Metagenomic analysis of the Fe-rich methanic sediment at site NB8 in the Bothnian Sea**

Metagenome assembly and binning of sediment samples at the coastal site NB8 resulted in a retrieval of 53 bacterial and 11 archaeal genomic bins with variable degree of completeness (Supplementary Table 1, only bins with >20% completeness, contamination level <10% and >0.1% proportion of total sequenced community were analyzed). In line with the abundance frequency in the 16S rRNA amplicon sequencing data, genome bins could be obtained for most abundant bacterial lineages including *Spirochaeta*, *Aminicenantes*, *Atribacteria*, *Chloroflexi*, *Actinobacteria*, *Bacteroidetes*, *Gemmatimonadales*, *Nitrospira*, *Planctomycetes*, *Parcubacteria*,  $\alpha$ -,  $\beta$ -,  $\gamma$ -,  $\delta$ -Proteobacteria and archaeal lineages including *Thaumarchaeota*, *Bathyarchaeota*, *Thorarchaeota*, *Methanomassiliicoccales*, *Methanosaeta*, *Methanosarcina*, ANME. We analyzed all bins and draft genomes for the presence of marker genes involved in fermentation, autotrophy/acetogenesis, methanogenesis/-troph and respiratory N and S cycles (Figures 6 and 7, Supplementary Table 2).

#### **Respiratory sulfur (S) cycle metabolism**

In anaerobic sediments, Fe and manganese (Mn) oxides can undergo abiotic reactions with H<sub>2</sub>S and lead to its oxidation to either partially reduced sulfur species (PRSS, comprising thiosulfate, polysulfide, tetrathionate, sulfite and elemental sulfur) or completely to SO<sub>4</sub><sup>2-</sup> (Zopfi et al. 2004). Anoxic Bothnian Sea sediments below the SMTZ have been shown to contain high concentrations of Fe oxides which consist for >50% of ferric (oxy)hydroxide (Egger et al. 2015a; Lenstra et al. 2018; Slomp et al. 2013). Thus, any free H<sub>2</sub>S is likely to react fast either with the Fe oxides or precipitate as FeS with Fe<sup>2+</sup>. Partial oxidation of free H<sub>2</sub>S with Fe oxides has been suggested to lead to formation of SO<sub>4</sub><sup>2-</sup> and thiosulfate (or other PRSS) which would act as an electron acceptor source for organisms which would reduce the PRSS and SO<sub>4</sub><sup>2-</sup> with donors such as acetate or H<sub>2</sub> back to H<sub>2</sub>S (Zopfi et al. 2004). This cycle has been described as cryptic S cycle in marine anoxic sediments (Brunner et al. 2016; Holmkvist et al. 2011). We analyzed the presence of functional gene biomarkers involved in reductive processes such as thiosulfate/polysulfide reductase (Phs/Psr), sulfhydrogenase (Hyd), tetrathionate reductase (Ttr), sulfite reductase (Asr), dimethyl sulphoxide (DMSO) reductase (Dms), adenylyl-sulfate reductase (Apr)/dissimilatory (bi)sulfite reductase (Dsr). The latter, Apr/Dsr complex, was also shown to catalyze the reverse reaction of H<sub>2</sub>S oxidation to SO<sub>4</sub><sup>2-</sup> in some *Proteobacteria* and *Chlorobi* (Ghosh and Dam 2009; Müller et al. 2015).

In general, genes potentially involved in PRSS transformations were detected in most of the retrieved bacterial MAGs indicating a potential for an active S cycle in the methanic zone below the SMTZ. Among archaeal MAGs, the most widespread PRSS metabolism biomarkers encoded sulfhydrogenase-like proteins. However, genes encoding all four subunits (HydABDG) were only detected in bins assigned to *Thorarchaeota*, corroborating recent findings about these recently characterized organisms (Seitz et al. 2016). Other bacterial and archaeal MAGs mostly only encoded one or two of the four Hyd-like comprising subunits.

Biomarkers for dissimilatory  $\text{SO}_4^{2-}$  reduction to  $\text{H}_2\text{S}$  (Apr/Dsr) were detected in six bacterial MAGs. Apr without the presence of Dsr was found in *Bacteroidales* and *Xanthomonadales/Chromatiales*, while Dsr without Apr was detected one *Aminicenantes* MAG. Both biomarkers were detected in *Syntrophobacterales* and *Gemmatimonadales*. Many members of the *Syntrophobacterales* order are  $\text{SO}_4^{2-}$  reducers frequently detected in anaerobic  $\text{SO}_4^{2-}$ -containing sediments (Plugge et al. 2011). The finding of one *Gemmatimonadales* genomes also containing both Apr and Dsr encoding genes was more surprising. Recently, similar observations were reported for *Gemmatimonadales* MAGs obtained from estuarine sediments (Baker et al. 2015), however no  $\text{SO}_4^{2-}$  reducers have been described so far from this group. Thus, these previously unknown potential SRB might be widespread in estuarine, marine and brackish sediments and their role in  $\text{SO}_4^{2-}$  reduction might have been overlooked in the past.

The detected Apr in one the *Xanthomonadales/Chromatiales* MAGs indicated potential involvement in sulfite oxidation. Members of *Chromatiales* and particularly *Ectothiorhodospiraceae* family, have been frequently detected in marine anoxic sediments and were shown to employ a chemolithoautrophic lifestyle of either Fe- or reduced S compound oxidation (Dyksma et al. 2016; Hallberg et al. 2011). The detection of a phosphoribulokinase (Prk) in one of the MAGs classified into this group further pointed to some of them likely being autotrophs.

Interestingly, homologues of a desulfovirdin-type dissimilatory sulfite reductase were detected in MAGs classified as ANME-2a and *Lokiarchaeota*. This type of a sulfite reductase is involved in an energy-yielding reduction of sulfite to  $\text{H}_2\text{S}$ . This finding is particularly interesting in the view of anaerobic  $\text{CH}_4$  oxidation potential in these sediments. ANME are typically associated with SRB in order to perform AOM, in which the bacterial partner would perform the reduction of  $\text{SO}_4^{2-}$  or PRSS to  $\text{H}_2\text{S}$  (Knittel and Boetius 2009). However, this finding indicates the potential of

Bothnian Sea ANME to perform the reduction of sulfite intrinsically. The ability of some ANME to reduce sulfur species has been observed earlier (Milucka et al. 2012).

Several core community members of putative fermenters including *Anaerolineales*, *Bacteroidales*, *Atribacteria* and *Aminicenantes* also encoded gene homologues for enzymes involved in PRSS transformations. This indicated flexible metabolic strategies switching between PRSS respiration and fermentations depending on environmental conditions.

Also DMSO reductase-like encoding genes were detected in several retrieved MAGs. DMSO is a common metabolite in marine and brackish ecosystems where it is produced by microalgae, phytoplankton and angiosperms as osmoprotectant (López and Duarte 2004). DMSO can then be used as electron acceptor under anaerobic conditions which results in the production of dimethyl sulfide. Among others, one MAG assigned to *Aminicenantes*, which is based on metagenome data the most abundant bacterial group in the investigated sediment layer (Supplementary Table 1), contained Dms-like encoding genes. Thus, potential for reductive respiratory S cycle metabolisms seems widespread in core community bacterial taxa.

In the presence of energetically more favorable electron acceptors like  $\text{NO}_3^-$  or  $\text{Mn}^{4+}$ , reduced sulfur compounds can be completely oxidized to  $\text{SO}_4^{2-}$  (Zopfi et al. 2004). This process would represent a source of  $\text{SO}_4^{2-}$  and thus electron acceptor for SRB. The analyzed biomarkers for PRSS and  $\text{H}_2\text{S}$  oxidation included sulfur dioxygenase (Sdo), sulfur oxidizing multi-enzyme system (Sox), sulfide:quinone oxidoreductase (Sqr) and sulfite oxidase (Soe). In general, homologues of genes encoding enzyme subunits involved in oxidative processes in the S cycle were less widespread than those involved in PRSS reduction. This redundancy in the potential for oxidative processes could be further explained with the lack or shortage of electron acceptors in this sediment layer. Thus, the residing microbial community would over time lose the ability for PRSS oxidation.

The results of respiratory S cycle analysis indicated the potential for PRSS reductive processes in many analyzed MAGs while that for oxidative ones was scarcer. These findings point to a possibility of a shorter operational S cycle where the abiotic oxidation of H<sub>2</sub>S by the reactive Fe would create a pool of PRSS which would be reduced back to H<sub>2</sub>S.

### **Respiratory nitrogen (N) cycle**

N cycle activities have been recently investigated in Öre Estuary sediments (Hellemann et al. 2017). Nitrification-denitrification seemed to be the dominant sink for reactive N in the ecosystem while anaerobic ammonium oxidation (anammox) was not detectable (Hellemann et al. 2017). Several genomic bins obtained within this study contained gene homologues encoding various enzymes catalyzing respiratory N cycle processes.

For the initial step of NO<sub>3</sub><sup>-</sup> reduction, two types of NO<sub>3</sub><sup>-</sup> reduction systems were analyzed: a periplasmic (Nap) and membrane-bound nitrate reductase (Nar). Nar resembles high similarity to nitrite oxidoreductase (Nxr) which catalyzes oxidation of nitrite (NO<sub>2</sub><sup>-</sup>) to NO<sub>3</sub><sup>-</sup>. Both Nap and Nar exhibited similar abundance among analyzed bacterial taxa. Only two groups, *Xanthomonadales/Chromatiales* and *Gemmatimonadales* contained both Nap and Nar. In addition, some *Gemmatimonadales* MAGs also contained genes encoding for enzymes catalyzing reduction of NO<sub>2</sub><sup>-</sup> to nitric oxide (NO) (NirK) and reduction of nitrous oxide (N<sub>2</sub>O) to N<sub>2</sub> (Nos). Next to a wide spectrum of genes involved in fermentation product metabolism, SO<sub>4</sub><sup>2-</sup> and PRSS reduction, the order *Gemmatimonadales* appeared to possess high metabolic diversity.

Nxr was only detected in one MAG classified as *Nitrospirales*, an order which includes many characterized NO<sub>2</sub><sup>-</sup> oxidizers widespread in natural ecosystems (Lücker et al. 2010). Additionally, it also contained a Cu-dependent nitrite reductase (NirK) encoding gene. Possibly, the detected

*Nitrospira* organisms could switch between  $\text{NO}_2^-$  oxidation and denitrification depending on redox potential and substrate availability.

*Syntrophobacterales* encoded a Nar and cytochrome c nitrite reductase (Nrf), besides the potential for  $\text{SO}_4^{2-}$  reduction. Previous studies with characterized SRB have shown the preferred use of  $\text{NO}_3^-$  as an electron acceptor when available (Krekeler and Cypionka 1995). The capability for DNRA seems to be a common trait among SRB and indicates a flexible metabolism depending on the availability of electron acceptors and a coupling of dissimilatory N and S cycles. Another recent study showed that SRB *Desulfurivibrio alkaliphilus* can employ a chemolithotrophic metabolism by  $\text{NO}_3^-$  reduction to  $\text{NH}_4^+$  and oxidation of  $\text{H}_2\text{S}$  to thiosulfate or elemental sulfur (Thorup et al. 2017). Research on partnerships of ANME with different types of SRB has indicated that availability of  $\text{NO}_3^-$  may play an important role in the establishment of certain types of ANME/SRB symbioses (Green-Saxena et al. 2014).  $\text{NO}_3^-$  was shown to be used as an N source, however its incorporation into biomass was secondary to  $\text{NH}_4^+$  and the authors could not exclude DNRA as a possible mechanism (Green-Saxena et al. 2014).

Functionally, dissimilatory  $\text{NO}_3^-$  reduction can be decoupled from further steps of  $\text{NO}_2^-$  reduction and an organism can excrete  $\text{NO}_2^-$  which can be further used as an electron acceptor by other community members. The fate of  $\text{NO}_2^-$  then differs depending on genomic potential. It can be either reduced to NO and then to  $\text{N}_2\text{O}$  or reduced in one step to  $\text{NH}_4^+$  by Nrf. NO is a toxic and very reactive metabolite which is usually processed by the cell immediately. Thus, we analyzed the presence of NO-forming nitrite reductases (NirK/NirS) in combination with NO reductases (Nor) as one module for denitrification to  $\text{N}_2\text{O}$ . The product of this process is  $\text{N}_2\text{O}$  which again can be either excreted into the environment or further reduced to  $\text{N}_2$ .  $\text{N}_2\text{O}$  reduction can be performed by a different functional group of denitrifiers. Both denitrification modules, to  $\text{N}_2\text{O}$  and to  $\text{N}_2$ , were spread among the retrieved MAGs indicating functional redundancy and

truncation in metabolic denitrification potential. However, activity measurements performed by Hellemann et al. 2017 revealed that the contribution of N<sub>2</sub>O production to total denitrification in Öre Estuary sediments was below 1% and was thus negligible. The ratio of N<sub>2</sub>O/N<sub>2</sub> as end product of denitrification is influenced by several factors including organic carbon and NO<sub>3</sub><sup>-</sup> loads (Weier et al. 1993). The Öre Estuary is an oligotrophic system which is limited in easy accessible electron donors (Hellemann et al. 2017). However, seasonal changes in the input of organic matter and N availability might shift the ratio of N<sub>2</sub>O to N<sub>2</sub> production in the system.

The potential for DNRA was only present in *Syntrophobacterales*, *Gemmatimonadales* and *Chrysiogenales* MAGs. They also possessed marker genes for PRSS transformations, thus DNRA could be driven by electrons derived from the oxidation of H<sub>2</sub>S or alternatively fermentation products. The activity of either DNRA or denitrification for NO<sub>2</sub><sup>-</sup> reduction would depend on the quality and availability of electron donors in the estuary sediment system.

Nitrification potential was assessed by the presence of Amo/Hao encoding genes. Amo/Hao catalyzes the oxidation of ammonia to NO<sub>2</sub><sup>-</sup>, which can then be used by NO<sub>2</sub><sup>-</sup> oxidizers such as *Nitrospira* for further oxidation to NO<sub>3</sub><sup>-</sup> by an Nxr. Both processes require a potent electron acceptor such as oxygen (O<sub>2</sub>). Two MAGs assigned to putative ammonia oxidizers could be retrieved from the analyzed sediment. One was assigned to *Nitrosomonadales*, a bacterial order which includes many characterized ammonia oxidizers, and another to archaeal *Thaumarchaeota*.

However, only the *Nitrosomonadales* MAG contained both Hao and Amo, the thaumarchaeal MAG lacked the genes encoding for Hao/Amo. However, since the latter was only 46% complete, it is likely that ammonia oxidation pathway encoding genes were not binned into the MAG. Both ammonia oxidizing bacteria (AOB) and archaea (AOA) might be participating in the oxidation of NH<sub>4</sub><sup>+</sup> to NO<sub>2</sub><sup>-</sup> in the coastal Bothnian Sea sediment. It is not clear, however, how O<sub>2</sub> would be available for their metabolism in the analyzed depth since air is unlikely to penetrate to

the methanic zone below the SMTZ. It has been shown previously that O<sub>2</sub> penetration depths are restricted to the upper centimeter in the Öre Estuary sediments (Hellemann et al. 2017). The presence of aerobic nitrifiers in anoxic environments has been frequently observed in the past and an alternative anaerobic metabolism was discussed as a possible lifestyle strategy (Abeliovich and Vonshak 1992; Schmidt et al. 2002; Weber et al. 2001). Some studies from the 1990s and more recent ones have hypothesized the possibility of nitrification coupled to metal oxide reduction involving, for example, Fe and Mn oxides (Hulth et al. 1999; Luther et al. 1997; Mogollón et al. 2016; Thamdrup and Dalsgaard 2000). An alternative explanation would be a dormant nitrifier community which was preserved at this depth due to fast sedimentation and slow degradation rates.

Our results show that even in the complete absence of O<sub>2</sub> and despite the activity of alternative anaerobic processes, the analyzed sediment still contains a genetic potential for O<sub>2</sub>-dependent nitrification.

### **Fermentative metabolism**

Fermentative processes are of central importance in sediment ecosystems since anaerobic degradation of deposited organic matter yields a variety of short chain fatty- and carboxylic acids and H<sub>2</sub> which can be further used in respiratory processes for the reduction of oxidized N-, S- and Fe species, methanogenesis and homoacetogenesis (Finke et al. 2007). The production and consumption of those organic and inorganic (H<sub>2</sub>) intermediates depends on factors such as sediment pH, temperature, quality of the deposited organic matter and availability of inorganic electron acceptors. These factors are expected to vary depending on seasonality, external input variability, bioturbation and sedimentation rates. Thus, the presence of gene biomarkers only

represents the potential of the system for the analyzed processes and not the actual metabolite flows.

In marine and brackish sediments where the pH is usually between 7 and 7.5, major fermentation products comprise acetate, formate, ethanol, propionate, butyrate, lactate and H<sub>2</sub>. Acetate is the central metabolite in marine sediments (Shaw and McIntosh 1990). We analyzed the presence of four functional biomarkers involved in acetate metabolism: (ADP-forming) acetate-CoA ligase (Acd), acetate kinase (Ack), acetyl-CoA hydrolase (Ach) and acetyl-CoA synthetase (Acs). Those enzymes can catalyze reactions in both directions which will depend on environmental conditions and the employed metabolism by the organism.

In general, most MAGs contained the genes encoding either one of several of the abovementioned enzymes. Acd and Acs were the most widespread acetate metabolism biomarkers among both bacteria and archaea including *Thorarchaeota*, *Bathyarchaeota* and *Lokiarchaeota*. Thus, those archaea could contribute to fermentative acetate production or assimilation in methanic sediments below SMTZ.

Formate metabolism was assessed by the presence of pyruvate-formate lyase (Pfl) which catalyzes formate formation from pyruvate, and formate dehydrogenase (Fdh/Fdo) for formate oxidation. Both genes were widely distributed among bacterial and archaeal bins. Many putative fermenters including *Spirochaetales*, *Bacteroidales*, *Aminicenantes* and *Atribacteria* contained both. Among archaeal MAGs, the potential for acetate and formate turnover was widespread corroborating previous results for *Bathyarchaeota* and *Thorarchaeota* being potentially involved in fermentative production of acetate and formate (Lazar et al. 2016; Seitz et al. 2016). The lowest distribution was observed for propionate turnover encoding genes (Prp).

The ability for ethanol metabolism which was assessed by the presence of aldehyde and alcohol dehydrogenases (Aldh/Adh/Exa/Frm/Yia/Eut) appeared to be one of the most widespread traits

among the retrieved bacterial MAGs. This was an indication for ethanol being next to acetate and formate an important metabolite in the analyzed sediment system. Among archaea, however, it was only detected in *Bathyarchaeota*, *Thaumarchaeota* and *Methanosaeta*, indicating their potential involvement in ethanol production/uptake.

Lactate metabolism was assessed by the presence of cytochrome- (Lldh/Ldhd) and NAD(P)-dependent (Ldh) lactate dehydrogenase encoding genes. Several bacterial MAGs possessed lactate utilization biomarkers. In archaea only the highly incomplete MAG assigned to ANME contained an Lldh-like gene. The rest of archaeal bins did not seem to possess capacity for lactate metabolism.

The ability for H<sub>2</sub> metabolism was assessed by the presence of genes encoding for subunits of various types of hydrogenases. Genes encoding for the following hydrogenase complexes were detected in the analyzed MAGs: bi-directional NAD(H)-dependent [NiFe] hydrogenase (Hox), periplasmic [NiFeSe] hydrogenase (Hya), [Fe] hydrogenase (Hyd), [NiFe] hydrogenases which couple H<sub>2</sub> production to formate or CO oxidation, ferredoxin-dependent bi-directional [NiFe] hydrogenase Ech, [FeFe] hydrogenases mostly involved in H<sub>2</sub> production but also oxidation in SRB particularly and F420-non-reducing hydrogenases. Overall, genes encoding hydrogenase subunits or hydrogenase maturation pathways were detected in most of the analyzed bacterial and archaeal MAGs indicating the central importance of H<sub>2</sub> in the analyzed sediment ecosystem.

Putative bacterial fermenters including *Spirochaetales*, *Bacteroidales*, *Anaerolineales*, *Aminicenantes* and SRB contained genes encoding several hydrogenase systems indicating an adaptation to ambient fluctuations in metabolite concentrations. One of the *Gemmatimonadales* MAGs which encoded the whole SO<sub>4</sub><sup>2-</sup> reduction pathway also contained genes encoding for two types of hydrogenases. Thus, this potential SRB could be utilizing H<sub>2</sub> as an electron donor for SO<sub>4</sub><sup>2-</sup> reduction. Similarly, also *Syntrophobacterales* which encoded the full SO<sub>4</sub><sup>2-</sup> reduction

pathway revealed a wide H<sub>2</sub> utilization potential via different hydrogenases. In general, all genomes with a Dsr encoded for one or several hydrogenases. Interestingly, also most archaeal MAGs contained genes encoding several hydrogenases indicating their important role in H<sub>2</sub> metabolism in Bothnian Sea sediments.

## **CO<sub>2</sub> fixation and acetogenesis**

Next to the organic matter input which is eventually turned over into CO<sub>2</sub>, energy and new biomass by heterotrophic organisms, CO<sub>2</sub> fixation by autotrophs represents another organic carbon input route into the sediment ecosystem. In deep anoxic sediments, autotrophs usually gain energy from the oxidation of inorganic electron donors such as H<sub>2</sub>S, PRSS, H<sub>2</sub> and reduced metals. In natural systems, CO<sub>2</sub> can be fixed via several pathways (Berg 2011). We analyzed the presence of gene biomarkers for the Wood-Ljungdahl pathway (WL) (carbon monoxide dehydrogenase, Cdh/Coo), Calvin-Benson-Bassham cycle (CBB) (phosphoribulokinase (Prk) and ribulose-1,5-bisphosphate carboxylase (Cbb)) and reductive citric acid cycle (rTCA) (ATP citrate lyase (Acl)).

Here, the WL pathway is not only indicative of autotrophy, but can also be used for acetate production by acetogens or assimilation of acetate, CO, or methylamines (Berg 2011). Methanogenic archaea use the WL pathway for both autotrophic CO<sub>2</sub> fixation and methanogenesis (Berg 2011). The Cdh/Coo biomarker was widespread among both bacterial and archaeal MAGs. As expected, the putative *Syntrophobacterales* SRB and other  $\delta$ -proteobacterial MAGs contained Cdh/Coo biomarkers. Previous research showed that SRB utilize the WL pathway in both reductive and oxidative directions (Schauder et al. 1988). One of the bins classified as *Lentisphaerales* contained Cdh/Coo biomarkers. So far, no reports on the presence

of the WL pathway in these organisms are available. Thus, they might represent novel acetate producers/scavengers in methanic sediments.

Also putative fermenters including *Spirochaetales*, *Anaerolineales*, *Aminicenantes* and *Atribacteria* contained Cdh/Coo-encoding biomarkers. In fermenters, the WL pathway was discussed to function as an electron sink by reduction of CO<sub>2</sub> to acetate (Berg 2011). Thus, those organism groups might be producing acetate via this route during fermentation. The potential for the WL pathway has also been detected previously in the MAG of a putatively fermentative *Chloroflexi* bacterium RBG-2 (Hug et al. 2013) and sediment-derived genomic bins assigned to *Anaerolineales* (Fullerton and Moyer 2016). It was discussed to be operating either under heterotrophic conditions to reduce the intracellular CO<sub>2</sub> by simultaneous oxidation of reduced ferredoxin and NADH, or under autotrophic conditions for CO<sub>2</sub> fixation (Hug et al. 2013; Ragsdale and Pierce 2008).

In many of the same MAGs which contained Cdh/Coo biomarkers we detected genes encoding for pyruvate-ferredoxin oxidoreductase (Pfor) which might point to a link between autotrophic CO<sub>2</sub> fixation via WL pathway and TCA cycle via acetyl-CoA (Furdui and Ragsdale 2000).

Cdh/Coo biomarkers were widespread among archaeal MAGs including methanogens, *Bathyarchaeota* and *Thaumarchaeota*. As discussed previously, methanogens use an archaeal variant of the WL pathway which is employed in hydrogenotrophic and acetotrophic methanogenesis (Berg 2011; Borrel et al. 2016). Interestingly, we also detected Cdh/Coo in one retrieved *Methanomassiliicoccales* MAG. To date, *Methanomassiliicoccales* methanogens, which have only been described recently, were collectively implicated in lacking the WL pathway and thus being restricted to H<sub>2</sub>-dependent methylotrophic methanogenesis (Borrel et al. 2016). By further GenBank protein database search we found that at least two other *Methanomassiliicoccales* genomes (RumEn M1 and RumEn M2) encode Cdh/Coo biomarkers

(accession nr. KQM11260 and KQM09953). Thus, some *Methanomassiliicoccales* genomes encode parts of the WL pathway. The detection of Cdh/Coo and other enzymes of the archaeal-type methylotrophic branch of WL pathway in one of the *Bathyarchaeota* MAGs obtained in this study further corroborated previous findings for this group of archaea (He et al. 2016; Lazar et al. 2016). *Bathyarchaeota* have been discussed to employ WL pathway for acetogenesis (He et al. 2016; Lazar et al. 2016). Similarly, Cdh/Coo and other genes encoding for the archaeal variant of the WL pathway were present in *Thorarchaeota* MAGs which hints to their involvement in acetogenesis in the analyzed sediment system.

Next to the WL pathway which is mainly found in anaerobic organisms operating close to the thermodynamic limit, CBB cycle is employed by a variety of chemolithoautotrophic organisms and can operate under higher redox potentials (Berg 2011). We analyzed the presence of two biomarkers which are unique to the CBB cycle: Prk and Cbb. Among bacterial MAGs, Cbb in combination with Prk was only detected in *Xanthomonadales/Chromatiales* and *Nitrosomonadales*. The ability for autotrophic CO<sub>2</sub> fixation via the CBB cycle has been recently reported to be widespread among  $\gamma$ -proteobacterial lineages *Woeseiaceae/JTB255* which belong to the core community in diverse marine sediments (Mußmann et al. 2017) and to which Bothnian Sea *Xanthomonadales/Chromatiales* were closely related. Several genomes have been shown to encode biomarkers of CBB cycle, truncated denitrification pathway to N<sub>2</sub>O and PRSS oxidation to SO<sub>4</sub><sup>2-</sup> (Dyksma et al. 2016; Mußmann et al. 2017). *Xanthomonadales/Chromatiales* MAGs obtained from the Bothnian Sea sediment contained biomarkers for PRSS transformations, denitrification and CBB cycle. Thus, these ubiquitous  $\gamma$ -Proteobacteria could be involved in chemolithoautotrophic PRSS oxidation coupled to denitrification to N<sub>2</sub>O in the coastal methanic sediments of the Bothnian Sea. The detection of CBB biomarkers in the obtained *Nitrosomonadales* MAG was in accordance with characterized chemolithoautotrophic

metabolism of this organism group (Utåker et al. 2002). However, as *Nitrosomonadales* might be involved in an alternative anaerobic metabolism in the analyzed sediment, the functionality of their CBB pathway remains unknown. This could be elucidated by future transcriptomic studies on this ecosystem.

Among archaea, Cbb encoding genes were detected in methanogens. Various methanogens have been shown previously to possess Cbb biomarkers, however their functionality remained debated. Recently, a functional pathway involving Cbb and Prk, similar to CBB cycle in autotrophic organisms, was proposed for methanogens (Kono et al. 2017). However, the ability for autotrophy based on this pathway among methanogens remains unclear (Kono et al. 2017).

rTCA cycle biomarker Acl was detected in one of the *Nitrospirales* MAGs which was closely related to a *Nitrospira* bacterium. NO<sub>2</sub><sup>-</sup>-oxidizing *Nitrospira* have been reported previously to employ rTCA cycle for CO<sub>2</sub> fixation (Lücker et al. 2010). Thus, this autotrophic pathway seems to be restricted to only one dominant group of bacteria residing in the analyzed sediment.

### **Methanogenesis-/trophy**

Three of the obtained archaeal MAGs could be classified as methanogens: *Methanosaeta*, *Methanosarcina* and *Methanomassiliicoccales*. Methyl-coenzyme M reductase (Mcr) was either partially or fully encoded in all three genomes. Members from those three groups have been described previously and represent different functional groups within methanogens. *Methanosaeta* from the family *Methanosaetaceae* is an obligate acetotroph which was reported to possess a high affinity to acetate and thrive under low ambient acetate concentrations (Jetten et al. 1992). In contrast, *Methanosarcina* methanogens possess a wide substrate spectrum but low affinity to acetate (Jetten et al. 1992). Despite high incompleteness of the obtained *Methanosarcina* genome, we identified genes encoding several complexes involved in

methylophilic metabolism. Both, *Methanosarcina* and *Methanosaeta* are abundant core community members in anaerobic methanic sediments (Carr et al. 2017; Webster et al. 2015). In contrast, the distribution of *Methanomassiliicoccales* methanogens in natural methanic sediments is underexplored. Originally, all described *Methanomassiliicoccales* were isolated or enriched from intestinal tracts of animals (Dridi et al. 2012). Since then, biomarkers of *Methanomassiliicoccales* have been detected in various sediment ecosystems and their distribution was investigated in more detail recently (Becker et al. 2016; Speth and Orphan 2018). All physiological and genomic information available so far point to a strictly H<sub>2</sub>-dependent methylophilic methanogenesis by a complete lack of the archaeal type WL pathway (Borrel et al. 2016). The genome we obtained from the methanic sediment in this study contains Cdh/Coo biomarkers which encode one of the key genes in WL pathway. Thus, its role in metabolism remains unknown or it might represent a remnant of the WL pathway which has been lost during *Methanomassiliicoccales* evolution. Interestingly, one archaeal genome (metabat2.27) obtained from the Bothnian Sea sediment was closely related to available *Methanomassiliicoccales* genomes obtained from GenBank but lacked Mcr and other essential methanogenic biomarkers. It is unclear whether this organism is a methanogen and further analysis of this potentially novel organism group is needed.

16S rRNA gene amplicon sequencing data revealed that methanophilic ANME-2 archaea were among the most abundant groups of archaea in the analyzed depth intervals. However, only one highly incomplete (22.6%) MAG classified as ANME-2a could be retrieved from the analyzed sediment. The MAG did not contain Mcr biomarkers so we analyzed the metagenome for its total *mcrA* inventory by blastx analysis (Figure 8). The result revealed ANME-like and *Methanosarcina*-like *mcrA* gene reads to make up the majority of the total *mcrA* pool.

Our results show that methanogenesis in the coastal Bothnian Sea sediments would be mostly based on methylated compounds, acetate and less on CO<sub>2</sub>/H<sub>2</sub>. Methylated compounds are common substrates in marine and brackish sediments as they are degradation products of osmoregulators such as trimethylamine oxide and quaternary amines (Sørensen and Glob 1987). These compounds are the so-called non-competitive substrates for methanogens, as SO<sub>4</sub><sup>2-</sup> reducers do not use them for SO<sub>4</sub><sup>2-</sup> reduction (King 1984). In contrast, acetate and H<sub>2</sub> are common electron donors for both SO<sub>4</sub><sup>2-</sup> reducers and methanogens so that methanogens are often outcompeted due to unfavorable substrate affinities (Oremland and Polcin 1982). The potentially methanotrophic ANME-2a archaea could undergo interactions with electron-scavenging bacteria which would respire PRSS or Fe oxides, since many bacteria possess sulfur-based metabolisms. Or they would alternatively reduce SO<sub>4</sub><sup>2-</sup> themselves as indicated by the presence of a desulfovirdin-type sulfite reductase.

## Conclusions

The obtained genomes and total functional gene analysis of dominant organisms from the coastal methanic sediments in the Bothnian Sea indicated wide genetic potential for respiratory S cycle via PRSS transformations and diverse fermentation metabolisms with acetate, alcohols and H<sub>2</sub> being potentially the major metabolites in the system. The potential for the respiratory N cycle was dominated by denitrification over DNRA and methanogenesis would be mostly based on methylated compounds and acetate. The archaeal population was dominated by putative anaerobic methanotrophs from the ANME-2a clade. Other abundant archaea which dominated the Bothnian Sea sediments included *Bathyarchaeota*, *Thorarchaeota* and *Lokiarchaeota*. Their

827 genetic potential indicated fermentations and PRSS respiration as possible lifestyle strategies. All  
 828 these processes will mainly depend on the quality and input amount of complex organic matter  
 829 which will form the basis for the food chain in anaerobic sediments. This hypothesis is feasible  
 830 since we observed significant differences in both archaeal and bacterial populations with distance  
 831 from the shoreline in the Bothnian Sea despite the similar overall concentrations of major  
 832 electron acceptors (e.g. Fe,  $\text{SO}_4^{2-}$ ). With the PRSS, Fe oxides are thought to play a critical role in  
 833 the observed redox transformations (Figure 9). For future studies enrichments and physiological  
 834 characterizations of dominant communities would improve our understanding of their  
 835 physiology, in situ biological function and biogeochemical impact.

## References

- Abeliovich, A., and A. Vonshak. 1992. Anaerobic metabolism of *Nitrosomonas europaea*. Archives of Microbiology **158**: 267-270.
- Algesten, G. and others 2006. Organic carbon budget for the Gulf of Bothnia. Journal of Marine Systems **63**: 155-161.
- Alneberg, J. and others 2014. Binning metagenomic contigs by coverage and composition. Nature methods **11**: 1144-1146.
- Aromokeye, D. A. and others 2018. Temperature Controls Crystalline Iron Oxide Utilization by Microbial Communities in Methanic Ferruginous Marine Sediment Incubations. Frontiers in Microbiology **9**.
- Asmala, E., J. Carstensen, D. J. Conley, C. P. Slomp, J. Stadmark, and M. Voss. 2017. Efficiency of the coastal filter: Nitrogen and phosphorus removal in the Baltic Sea. Limnology and Oceanography **62**: S222-S238.
- Baker, B. J., C. S. Lazar, A. P. Teske, and G. J. Dick. 2015. Genomic resolution of linkages in carbon, nitrogen, and sulfur cycling among widespread estuary sediment bacteria. Microbiome **3**: 14.
- Bange, H. W., U. H. Bartell, S. Rapsomanikis, and M. O. Andreae. 1994. Methane in the Baltic and North Seas and a reassessment of the marine emissions of methane. Global Biogeochemical Cycles **8**: 465-480.
- Becker, K. W., F. J. Elling, M. Y. Yoshinaga, A. Söllinger, T. Urich, and K.-U. Hinrichs. 2016. Unusual Butane- and Pentanetriol-Based Tetraether Lipids in *Methanomassiliicoccus luminyensis*, a Representative of the Seventh Order of Methanogens. Applied and Environmental Microbiology **82**: 4505-4516.
- Berg, I. A. 2011. Ecological Aspects of the Distribution of Different Autotrophic CO<sub>2</sub> Fixation Pathways. Applied and Environmental Microbiology **77**: 1925-1936.
- Bolhuis, H., H. Schluepmann, J. Kristalijn, Z. Sulaiman, and D. J. Marshall. 2014. Molecular analysis of bacterial diversity in mudflats along the salinity gradient of an acidified tropical Bornean estuary (South East Asia). Aquatic Biosystems **10**: 10.
- Bonaglia, S. and others 2017. The fate of fixed nitrogen in marine sediments with low organic loading: an in situ study. Biogeosciences **14**: 285-300.
- Borrel, G., P. S. Adam, and S. Gribaldo. 2016. Methanogenesis and the Wood–Ljungdahl Pathway: An Ancient, Versatile, and Fragile Association. Genome Biology and Evolution **8**: 1706-1711.
- Breznak, J. A., and F. Warnecke. 2008. *Spirochaeta cellobiosiphila* sp. nov., a facultatively anaerobic, marine spirochaete. International Journal of Systematic and Evolutionary Microbiology **58**: 2762-2768.
- Brunner, B., G. L. Arnold, H. Røy, I. A. Müller, and B. B. Jørgensen. 2016. Off Limits: Sulfate below the Sulfate-Methane Transition. Frontiers in Earth Science **4**.
- Bushnell, B. BBMap. [sourceforge.net/projects/bbmap/](https://sourceforge.net/projects/bbmap/) (unpublished).
- Caporaso, J. G. and others 2012. Ultra-high-throughput microbial community analysis on the Illumina HiSeq and MiSeq platforms. The ISME Journal **6**: 1621.
- Cardman, Z. and others 2014. Verrucomicrobia Are Candidates for Polysaccharide-Degrading Bacterioplankton in an Arctic Fjord of Svalbard. Applied and Environmental Microbiology **80**: 3749-3756.

878 Carr, S. A., B. N. Orcutt, K. W. Mandernack, and J. R. Spear. 2015. Abundant Atribacteria in deep marine  
879 sediment from the Adélie Basin, Antarctica. *Frontiers in Microbiology* **6**: 872.

880 Carr, S. A. and others 2017. Acetoclastic *Methanosaeta* are dominant methanogens in organic-rich  
881 Antarctic marine sediments. *The ISME Journal* **12**: 330.

882 Castelle, Cindy J. and others 2015. Genomic Expansion of Domain Archaea Highlights Roles for  
883 Organisms from New Phyla in Anaerobic Carbon Cycling. *Current Biology* **25**: 690-701.

884 Dridi, B., M.-L. Fardeau, B. Ollivier, D. Raoult, and M. Drancourt. 2012. *Methanomassiliicoccus*  
885 *luminyensis* gen. nov., sp. nov., a methanogenic archaeon isolated from human faeces.  
886 *International Journal of Systematic and Evolutionary Microbiology* **62**: 1902-1907.

887 Dykstra, S. and others 2016. Ubiquitous Gammaproteobacteria dominate dark carbon fixation in coastal  
888 sediments. *The ISME Journal* **10**: 1939-1953.

889 Edgar, R. C., B. J. Haas, J. C. Clemente, C. Quince, and R. Knight. 2011. UCHIME improves sensitivity  
890 and speed of chimera detection. *Bioinformatics* **27**: 2194-2200.

891 Egger, M., T. Jilbert, T. Behrends, C. Rivard, and C. P. Slomp. 2015a. Vivianite is a major sink for  
892 phosphorus in methanogenic coastal surface sediments. *Geochimica et Cosmochimica Acta* **169**:  
893 217-235.

894 Egger, M. and others 2015b. Iron-Mediated Anaerobic Oxidation of Methane in Brackish Coastal  
895 Sediments. *Environmental Science & Technology* **49**: 277-283.

896 Evans, P. N. and others 2015. Methane metabolism in the archaeal phylum Bathyarchaeota revealed by  
897 genome-centric metagenomics. *Science* **350**: 434-438.

898 Finke, N., V. Vandieken, and B. B. Jørgensen. 2007. Acetate, lactate, propionate, and isobutyrate as  
899 electron donors for iron and sulfate reduction in Arctic marine sediments, Svalbard. *FEMS*  
900 *Microbiology Ecology* **59**: 10-22.

901 Fricke, W. F. and others 2006. The Genome Sequence of *Methanosphaera stadtmanae* Reveals Why This  
902 Human Intestinal Archaeon Is Restricted to Methanol and H<sub>2</sub> for Methane Formation and ATP  
903 Synthesis. *Journal of Bacteriology* **188**: 642-658.

904 Fullerton, H., and C. L. Moyer. 2016. Comparative Single-Cell Genomics of Chloroflexi from the  
905 Okinawa Trough Deep-Subsurface Biosphere. *Applied and Environmental Microbiology* **82**:  
906 3000-3008.

907 Furdui, C., and S. W. Ragsdale. 2000. The Role of Pyruvate Ferredoxin Oxidoreductase in Pyruvate  
908 Synthesis during Autotrophic Growth by the Wood-Ljungdahl Pathway. *Journal of Biological*  
909 *Chemistry* **275**: 28494-28499.

910 Ghosh, W., and B. Dam. 2009. Biochemistry and molecular biology of lithotrophic sulfur oxidation by  
911 taxonomically and ecologically diverse bacteria and archaea. *FEMS Microbiology Reviews* **33**:  
912 999-1043.

913 Green-Saxena, A., A. E. Dekas, N. F. Dalleska, and V. J. Orphan. 2014. Nitrate-based niche  
914 differentiation by distinct sulfate-reducing bacteria involved in the anaerobic oxidation of  
915 methane. *The ISME Journal* **8**: 150-163.

916 Hallberg, K. B., S. Hedrich, and D. B. Johnson. 2011. *Acidiferrobacter thiooxydans*, gen. nov. sp. nov.; an  
917 acidophilic, thermo-tolerant, facultatively anaerobic iron- and sulfur-oxidizer of the family  
918 *Ectothiorhodospiraceae*. *Extremophiles* **15**: 271-279.

- 919 Harris, R. L. and others 2018. Draft Genome Sequence of “*Candidatus* Bathyarchaeota” Archaeon  
920 BE326-BA-RLH, an Uncultured Denitrifier and Putative Anaerobic Methanotroph from South  
921 Africa’s Deep Continental Biosphere. *Microbiology Resource Announcements* **7**: e01295-01218.
- 922 Harrison, B. K., A. Myrbo, B. E. Flood, and J. V. Bailey. 2016. Identification of subannual patterns in  
923 microbial community signatures from individual sedimentary laminae using a freeze-coring  
924 approach. *Limnology and Oceanography* **61**: 735-747.
- 925 Harrison, B. K., H. Zhang, W. Berelson, and V. J. Orphan. 2009. Variations in Archaeal and Bacterial  
926 Diversity Associated with the Sulfate-Methane Transition Zone in Continental Margin Sediments  
927 (Santa Barbara Basin, California). *Applied and Environmental Microbiology* **75**: 1487-1499.
- 928 He, Y. and others 2016. Genomic and enzymatic evidence for acetogenesis among multiple lineages of the  
929 archaeal phylum Bathyarchaeota widespread in marine sediments. *Nature Microbiology* **1**: 16035.
- 930 Hellemann, D., P. Tallberg, I. Bartl, M. Voss, and S. Hietanen. 2017. Denitrification in an oligotrophic  
931 estuary: a delayed sink for riverine nitrate. *Marine Ecology Progress Series* **583**: 63-80.
- 932 Herlemann, D. P. R., M. Labrenz, K. Jürgens, S. Bertilsson, J. J. Waniek, and A. F. Andersson. 2011.  
933 Transitions in bacterial communities along the 2000 km salinity gradient of the Baltic Sea. *The*  
934 *ISME Journal* **5**: 1571.
- 935 Holmkvist, L., T. G. Ferdelman, and B. B. Jørgensen. 2011. A cryptic sulfur cycle driven by iron in the  
936 methane zone of marine sediment (Aarhus Bay, Denmark). *Geochimica et Cosmochimica Acta*  
937 **75**: 3581-3599.
- 938 Hug, L. A. and others 2013. Community genomic analyses constrain the distribution of metabolic traits  
939 across the Chloroflexi phylum and indicate roles in sediment carbon cycling. *Microbiome* **1**: 22.
- 940 Hugoni, M. and others 2015. Temporal dynamics of active Archaea in oxygen-depleted zones of two deep  
941 lakes. *Environmental Microbiology Reports* **7**: 321-329.
- 942 Hulth, S., R. C. Aller, and F. Gilbert. 1999. Coupled anoxic nitrification/manganese reduction in marine  
943 sediments. *Geochimica et Cosmochimica Acta* **63**: 49-66.
- 944 Huson, D. H., A. F. Auch, J. Qi, and S. C. Schuster. 2007. MEGAN analysis of metagenomic data.  
945 *Genome Research* **17**: 377-386.
- 946 Imachi, H., and S. Sakai. 2015. Methanoregulaceae. *Bergey's Manual of Systematics of Archaea and*  
947 *Bacteria*. John Wiley & Sons, Ltd.
- 948 Jagersma, G. C. and others 2009. Microbial diversity and community structure of a highly active  
949 anaerobic methane-oxidizing sulfate-reducing enrichment. *Environmental Microbiology* **11**:  
950 3223-3232.
- 951 Jetten, M. S. M., A. J. M. Stams, and A. J. B. Zehnder. 1992. Methanogenesis from acetate: a comparison  
952 of the acetate metabolism in *Methanotheroxobacter* and *Methanosarcina* spp. *FEMS*  
953 *Microbiology Letters* **88**: 181-198.
- 954 Kang, D. D., J. Froula, R. Egan, and Z. Wang. 2015. MetaBAT, an efficient tool for accurately  
955 reconstructing single genomes from complex microbial communities. *PeerJ* **3**: e1165.
- 956 King, G. M. 1984. Utilization of hydrogen, acetate, and “noncompetitive”; substrates by methanogenic  
957 bacteria in marine sediments. *Geomicrobiology Journal* **3**: 275-306.
- 958 Knittel, K., and A. Boetius. 2009. Anaerobic Oxidation of Methane: Progress with an Unknown Process.  
959 *Annual Review of Microbiology* **63**: 311-334.
- 960 Kono, T. and others 2017. A RuBisCO-mediated carbon metabolic pathway in methanogenic archaea.  
961 *Nature Communications* **8**: 14007.

962 Kozich, J. J., S. L. Westcott, N. T. Baxter, S. K. Highlander, and P. D. Schloss. 2013. Development of a  
963 dual-index sequencing strategy and curation pipeline for analyzing amplicon sequence data on the  
964 MiSeq Illumina sequencing platform. *Applied and Environmental Microbiology* **79**: 5112-5120.

965 Krekeler, D., and H. Cypionka. 1995. The preferred electron acceptor of *Desulfovibrio desulfuricans*  
966 CSN. *FEMS Microbiology Ecology* **17**: 271-277.

967 Lazar, C. S. and others 2016. Genomic evidence for distinct carbon substrate preferences and ecological  
968 niches of Bathyarchaeota in estuarine sediments. *Environmental Microbiology* **18**: 1200-1211.

969 Leloup, J., A. Loy, N. J. Knab, C. Borowski, M. Wagner, and B. B. Jørgensen. 2007. Diversity and  
970 abundance of sulfate-reducing microorganisms in the sulfate and methane zones of a marine  
971 sediment, Black Sea. *Environmental Microbiology* **9**: 131-142.

972 Lenstra, W. K., M. Egger, N. A. G. M. van Helmond, E. Kritzberg, D. J. Conley, and C. P. Slomp. 2018.  
973 Variations in river input of iron impact sedimentary phosphorus burial in an oligotrophic Baltic  
974 Sea estuary. *Biogeosciences* **15**: 6979-6996.

975 Li, D., C.-M. Liu, R. Luo, K. Sadakane, and T.-W. Lam. 2015. MEGAHIT: an ultra-fast single-node  
976 solution for large and complex metagenomics assembly via succinct de Bruijn graph.  
977 *Bioinformatics* **31**: 1674-1676.

978 Li, D. and others 2016. MEGAHIT v1.0: A fast and scalable metagenome assembler driven by advanced  
979 methodologies and community practices. *Methods* **102**: 3-11.

980 Li, H., and R. Durbin. 2010. Fast and accurate long-read alignment with Burrows-Wheeler transform.  
981 *Bioinformatics* **26**: 589-595.

982 Li, H. and others 2009. The Sequence Alignment/Map format and SAMtools. *Bioinformatics* **25**: 2078-  
983 2079.

984 Linz, A. M. and others 2017. Bacterial Community Composition and Dynamics Spanning Five Years in  
985 Freshwater Bog Lakes. *mSphere* **2**: e00169-00117.

986 Liu, Y., and W. B. Whitman. 2008. Metabolic, Phylogenetic, and Ecological Diversity of the  
987 Methanogenic Archaea. *Annals of the New York Academy of Sciences* **1125**: 171-189.

988 Lloyd, K. G. and others 2013. Predominant archaea in marine sediments degrade detrital proteins. *Nature*  
989 **496**: 215.

990 López, N. I., and C. M. Duarte. 2004. Dimethyl sulfoxide (DMSO) reduction potential in Mediterranean  
991 seagrass (*Posidonia oceanica*) sediments. *Journal of Sea Research* **51**: 11-20.

992 Lu, Y. Y., T. Chen, J. A. Fuhrman, and F. Sun. 2017. COCACOLA: binning metagenomic contigs using  
993 sequence COmposition, read COverage, CO-alignment and paired-end read LinkAge.  
994 *Bioinformatics* **33**: 791-798.

995 Lückner, S. and others 2010. A *Nitrospira* metagenome illuminates the physiology and evolution of  
996 globally important nitrite-oxidizing bacteria. *Proceedings of the National Academy of Sciences*  
997 **107**: 13479-13484.

998 Ludwig, W. and others 2004. ARB: a software environment for sequence data. *Nucleic Acids Research*  
999 **32**: 1363-1371.

1000 Lüke, C., D. R. Speth, M. A. R. Kox, L. Villanueva, and M. S. M. Jetten. 2016. Metagenomic analysis of  
1001 nitrogen and methane cycling in the Arabian Sea oxygen minimum zone. *PeerJ* **4**: e1924.

1002 Luther, G. W., B. Sundby, B. L. Lewis, P. J. Brendel, and N. Silverberg. 1997. Interactions of manganese  
1003 with the nitrogen cycle: Alternative pathways to dinitrogen. *Geochimica et Cosmochimica Acta*  
1004 **61**: 4043-4052.

- 1005 Martinez-Garcia, M. and others 2012. Capturing Single Cell Genomes of Active Polysaccharide  
1006 Degradors: An Unexpected Contribution of Verrucomicrobia. *PLoS One* **7**: e35314.
- 1007 McGlynn, S. E., G. L. Chadwick, C. P. Kempes, and V. J. Orphan. 2015. Single cell activity reveals direct  
1008 electron transfer in methanotrophic consortia. *Nature* **526**: 531.
- 1009 Milucka, J. and others 2012. Zero-valent sulphur is a key intermediate in marine methane oxidation.  
1010 *Nature* **491**: 541.
- 1011 Miyazaki, M., S. Sakai, Y. Yamanaka, Y. Saito, K. Takai, and H. Imachi. 2014. *Spirochaeta psychrophila*  
1012 sp. nov., a psychrophilic spirochaete isolated from seafloor sediment, and emended description  
1013 of the genus *Spirochaeta*. *International Journal of Systematic and Evolutionary Microbiology* **64**:  
1014 2798-2804.
- 1015 Mogollón, J. M., K. Mewes, and S. Kasten. 2016. Quantifying manganese and nitrogen cycle coupling in  
1016 manganese-rich, organic carbon-starved marine sediments: Examples from the Clarion-Clipperton  
1017 fracture zone. *Geophysical Research Letters* **43**: 7114-7123.
- 1018 Moriya, Y., M. Itoh, S. Okuda, A. C. Yoshizawa, and M. Kanehisa. 2007. KAAS: an automatic genome  
1019 annotation and pathway reconstruction server. *Nucleic Acids Research* **35**: W182-W185.
- 1020 Mußmann, M., P. Pjevac, K. Krüger, and S. Dykema. 2017. Genomic repertoire of the  
1021 *Woeseiaceae*/JTB255, cosmopolitan and abundant core members of microbial communities in  
1022 marine sediments. *The ISME Journal* **11**: 1276.
- 1023 Na, H., M. A. Lever, K. U. Kjeldsen, F. Schulz, and B. B. Jørgensen. 2015. Uncultured  
1024 *Desulfobacteraceae* and *Crenarchaeotal* group C3 incorporate <sup>13</sup>C-acetate in coastal marine  
1025 sediment. *Environmental Microbiology Reports* **7**: 614-622.
- 1026 Na, S.-I., Y. O. Kim, S.-H. Yoon, S.-m. Ha, I. Baek, and J. Chun. 2018. UBCG: Up-to-date bacterial core  
1027 gene set and pipeline for phylogenomic tree reconstruction. *Journal of Microbiology* **56**: 280-285.
- 1028 Newberry, C. J., G. Webster, B. A. Cragg, R. J. Parkes, A. J. Weightman, and J. C. Fry. 2004. Diversity of  
1029 prokaryotes and methanogenesis in deep subsurface sediments from the Nankai Trough, Ocean  
1030 Drilling Program Leg 190. *Environmental Microbiology* **6**: 274-287.
- 1031 Nobu, M. K. and others 2016. Phylogeny and physiology of candidate phylum 'Atribacteria' (OP9/JS1)  
1032 inferred from cultivation-independent genomics. *The ISME Journal* **10**: 273-286.
- 1033 Oksanen, J. and others 2018. *Vegan: Community Ecology Package*. R package version 2.3-3.
- 1034 Oni, O. and others 2015a. Distinct microbial populations are tightly linked to the profile of dissolved iron  
1035 in the methanic sediments of the Helgoland mud area, North Sea. *Frontiers in Microbiology* **6**:  
1036 365.
- 1037 Oni, O. E. and others 2015b. Microbial Communities and Organic Matter Composition in Surface and  
1038 Subsurface Sediments of the Helgoland Mud Area, North Sea. *Frontiers in Microbiology* **6**: 1290.
- 1039 Oremland, R. S., and S. Polcin. 1982. Methanogenesis and Sulfate Reduction: Competitive and  
1040 Noncompetitive Substrates in Estuarine Sediments. *Applied and Environmental Microbiology* **44**:  
1041 1270-1276.
- 1042 Oren, A. 2014. The Family *Methanobacteriaceae*, p. 165-193. In E. Rosenberg, E. F. DeLong, S. Lory, E.  
1043 Stackebrandt and F. Thompson [eds.], *The Prokaryotes: Other Major Lineages of Bacteria and*  
1044 *The Archaea*. Springer Berlin Heidelberg.
- 1045 Parks, D. H., M. Imelfort, C. T. Skennerton, P. Hugenholtz, and G. W. Tyson. 2015. CheckM: assessing  
1046 the quality of microbial genomes recovered from isolates, single cells, and metagenomes. *Genome*  
1047 *research* **25**: 1043-1055.

- 1048 Pester, M., C. Schleper, and M. Wagner. 2011. The Thaumarchaeota: an emerging view of their  
1049 phylogeny and ecophysiology. *Current Opinion in Microbiology* **14**: 300-306.
- 1050 Pfennig, N., F. Widdel, and H. G. Trüper. 1981. The Dissimilatory Sulfate-Reducing Bacteria, p. 926-940.  
1051 *In* M. P. Starr, H. Stolp, H. G. Trüper, A. Balows and H. G. Schlegel [eds.], *The Prokaryotes: A*  
1052 *Handbook on Habitats, Isolation, and Identification of Bacteria*. Springer Berlin Heidelberg.
- 1053 Plugge, C. M., W. Zhang, J. C. M. Scholten, and A. J. M. Stams. 2011. Metabolic Flexibility of Sulfate-  
1054 Reducing Bacteria. *Frontiers in Microbiology* **2**: 81.
- 1055 Pruesse, E. and others 2007. SILVA: a comprehensive online resource for quality checked and aligned  
1056 ribosomal RNA sequence data compatible with ARB. *Nucleic Acids Research* **35**.
- 1057 Ragsdale, S. W., and E. Pierce. 2008. Acetogenesis and the Wood-Ljungdahl Pathway of CO(2) Fixation.  
1058 *Biochimica et Biophysica Acta* **1784**: 1873-1898.
- 1059 Rasigraf, O., J. Schmitt, M. S. M. Jetten, and C. Lüke. 2017. Metagenomic potential for and diversity of  
1060 N-cycle driving microorganisms in the Bothnian Sea sediment. *MicrobiologyOpen* **6**: e00475-n/a.
- 1061 Reyes, C. and others 2016. Bacterial communities potentially involved in iron-cycling in Baltic Sea and  
1062 North Sea sediments revealed by pyrosequencing. *FEMS Microbiology Ecology* **92**: fiw054-  
1063 fiw054.
- 1064 Reyes, C., D. Schneider, M. Lipka, A. Thürmer, M. E. Böttcher, and M. W. Friedrich. 2017. Nitrogen  
1065 Metabolism Genes from Temperate Marine Sediments. *Marine Biotechnology* **19**: 175-190.
- 1066 Roalkvam, I., H. Dahle, Y. Chen, S. Jørgensen, H. Haflidason, and I. Steen. 2012. Fine-Scale Community  
1067 Structure Analysis of ANME in Nyegga Sediments with High and Low Methane Flux. *Frontiers*  
1068 *in Microbiology* **3**.
- 1069 Roalkvam, I. and others 2011. New insight into stratification of anaerobic methanotrophs in cold seep  
1070 sediments. *FEMS Microbiology Ecology* **78**: 233-243.
- 1071 Rooze, J., M. Egger, I. Tsandev, and C. P. Slomp. 2016. Iron-dependent anaerobic oxidation of methane in  
1072 coastal surface sediments: Potential controls and impact. *Limnology and Oceanography* **61**: S267-  
1073 S282.
- 1074 RStudio Team. 2015. RStudio: Integrated Development for R. RStudio, Inc., Boston, MA URL  
1075 <http://www.rstudio.com/>.
- 1076 Ruff, S. E., J. F. Biddle, A. P. Teske, K. Knittel, A. Boetius, and A. Ramette. 2015. Global dispersion and  
1077 local diversification of the methane seep microbiome. *Proceedings of the National Academy of*  
1078 *Sciences* **112**: 4015-4020.
- 1079 Schauder, R., A. Preuß, M. Jetten, and G. Fuchs. 1988. Oxidative and reductive acetyl CoA/carbon  
1080 monoxide dehydrogenase pathway in *Desulfobacterium autotrophicum*. *Archives of Microbiology*  
1081 **151**: 84-89.
- 1082 Scheller, S., H. Yu, G. L. Chadwick, S. E. McGlynn, and V. J. Orphan. 2016. Artificial electron acceptors  
1083 decouple archaeal methane oxidation from sulfate reduction. *Science* **351**: 703-707.
- 1084 Schlitzer, R. 2015. Ocean Data View. <http://odv.awi.de>.
- 1085 Schmidt, I. and others 2002. Aerobic and anaerobic ammonia oxidizing bacteria – competitors or natural  
1086 partners? *FEMS Microbiology Ecology* **39**: 175-181.
- 1087 Schreiber, L., T. Holler, K. Knittel, A. Meyerdierks, and R. Amann. 2010. Identification of the dominant  
1088 sulfate-reducing bacterial partner of anaerobic methanotrophs of the ANME-2 clade.  
1089 *Environmental Microbiology* **12**: 2327-2340.

- 1090 Seitz, K. W., C. S. Lazar, K.-U. Hinrichs, A. P. Teske, and B. J. Baker. 2016. Genomic reconstruction of a  
1091 novel, deeply branched sediment archaeal phylum with pathways for acetogenesis and sulfur  
1092 reduction. *The ISME Journal* **10**: 1696-1705.
- 1093 Shaw, D. G., and D. J. McIntosh. 1990. Acetate in recent anoxic sediments: Direct and indirect  
1094 measurements of concentration and turnover rates. *Estuarine, Coastal and Shelf Science* **31**: 775-  
1095 788.
- 1096 Shivani, Y., Y. Subhash, L. Tushar, C. Sasikala, and C. V. Ramana. 2015. *Spirochaeta lutea* sp. nov.,  
1097 isolated from marine habitats and emended description of the genus *Spirochaeta*. *Systematic and*  
1098 *Applied Microbiology* **38**: 110-114.
- 1099 Sieber, C. M. K. and others 2018. Recovery of genomes from metagenomes via a dereplication,  
1100 aggregation and scoring strategy. *Nature Microbiology* **3**: 836-843.
- 1101 Slomp, C. P., H. P. Mort, T. Jilbert, D. C. Reed, B. G. Gustafsson, and M. Wolthers. 2013. Coupled  
1102 Dynamics of Iron and Phosphorus in Sediments of an Oligotrophic Coastal Basin and the Impact  
1103 of Anaerobic Oxidation of Methane. *PLOS ONE* **8**: e62386.
- 1104 Sørensen, J., and E. Glob. 1987. Influence of benthic fauna on trimethylamine concentrations in coastal  
1105 marine sediments. *Marine Ecology Progress Series*: 15-21.
- 1106 Speth, D. R., and V. J. Orphan. 2018. Metabolic marker gene mining provides insight in global *mcrA*  
1107 diversity and, coupled with targeted genome reconstruction, sheds further light on metabolic  
1108 potential of the *Methanomassiliicoccales*. *PeerJ* **6**: e5614.
- 1109 Storesund, J. E., and L. Øvreås. 2013. Diversity of Planctomycetes in iron-hydroxide deposits from the  
1110 Arctic Mid Ocean Ridge (AMOR) and description of *Bythopirellula goksoyri* gen. nov., sp. nov.,  
1111 a novel Planctomycete from deep sea iron-hydroxide deposits. *Antonie van Leeuwenhoek* **104**:  
1112 569-584.
- 1113 Takai, K., and K. Horikoshi. 2000. Rapid detection and quantification of members of the archaeal  
1114 community by quantitative PCR using fluorogenic probes. *Applied and environmental*  
1115 *microbiology* **66**: 5066-5072.
- 1116 Thamdrup, B., and T. Dalsgaard. 2000. The fate of ammonium in anoxic manganese oxide-rich marine  
1117 sediment. *Geochimica et Cosmochimica Acta* **64**: 4157-4164.
- 1118 Thorup, C., A. Schramm, A. J. Findlay, K. W. Finster, and L. Schreiber. 2017. Disguised as a Sulfate  
1119 Reducer: Growth of the Deltaproteobacterium *Desulfurivibrio alkaliphilus* by Sulfide Oxidation  
1120 with Nitrate. *mBio* **8**.
- 1121 Treude, T., M. Krüger, A. Boetius, and B. B. Jørgensen. 2005. Environmental control on anaerobic  
1122 oxidation of methane in the gassy sediments of Eckernförde Bay (German Baltic). *Limnology and*  
1123 *Oceanography* **50**: 1771-1786.
- 1124 Utåker, J. B., K. Andersen, Å. Aakra, B. Moen, and I. F. Nes. 2002. Phylogeny and Functional Expression  
1125 of Ribulose 1,5-Bisphosphate Carboxylase/Oxygenase from the Autotrophic Ammonia-Oxidizing  
1126 Bacterium *Nitrosospira* sp. Isolate 40KI. *Journal of Bacteriology* **184**: 468-478.
- 1127 Vallenet, D. and others 2006. MaGe: a microbial genome annotation system supported by synteny results.  
1128 *Nucleic Acids Research* **34**: 53-65.
- 1129 Weber, E. B., L. E. Lehtovirta-Morley, J. I. Prosser, and C. Gubry-Rangin. 2015. Ammonia oxidation is  
1130 not required for growth of Group 1.1c soil Thaumarchaeota. *FEMS Microbiology Ecology* **91**:  
1131 fiv001-fiv001.
- 1132 Weber, S., S. Stubner, and R. Conrad. 2001. Bacterial Populations Colonizing and Degrading Rice Straw  
1133 in Anoxic Paddy Soil. *Applied and Environmental Microbiology* **67**: 1318-1327.

1134 Webster, G. and others 2015. Archaeal community diversity and abundance changes along a natural  
1135 salinity gradient in estuarine sediments. *FEMS Microbiology Ecology* **91**: 1-18.

1136 Webster, G., J. Rinna, E. G. Roussel, J. C. Fry, A. J. Weightman, and R. J. Parkes. 2010. Prokaryotic  
1137 functional diversity in different biogeochemical depth zones in tidal sediments of the Severn  
1138 Estuary, UK, revealed by stable-isotope probing. *FEMS Microbiology Ecology* **72**: 179-197.

1139 Weier, K. L., J. W. Doran, J. F. Power, and D. T. Walters. 1993. Denitrification and the  
1140 Dinitrogen/Nitrous Oxide Ratio as Affected by Soil Water, Available Carbon, and Nitrate. *Soil*  
1141 *Science Society of America Journal* **57**: 66-72.

1142 Wickham, H. 2016. *ggplot2: Elegant Graphics for Data Analysis*. Springer-Verlag New York.

1143 Winkelmann, N. and others 2010. Determination of the Diversity of Rhodopirellula Isolates from  
1144 European Seas by Multilocus Sequence Analysis. *Applied and Environmental Microbiology* **76**:  
1145 776-785.

1146 Wu, Y. W., B. A. Simmons, and S. W. Singer. 2016. MaxBin 2.0: an automated binning algorithm to  
1147 recover genomes from multiple metagenomic datasets. *Bioinformatics* **32**: 605-607.

1148 Yamada, T. and others 2006. *Anaerolinea thermolimosa* sp. nov., *Levilinea saccharolytica* gen. nov., sp.  
1149 nov. and *Leptolinea tardivitalis* gen. nov., sp. nov., novel filamentous anaerobes, and description  
1150 of the new classes *Anaerolineae* classis nov. and *Caldilineae* classis nov. in the bacterial phylum  
1151 *Chloroflexi*. *International Journal of Systematic and Evolutionary Microbiology* **56**: 1331-1340.

1152 Zeng, Y.-X., Y. Yu, H.-R. Li, and W. Luo. 2017. Prokaryotic Community Composition in Arctic  
1153 Kongsfjorden and Sub-Arctic Northern Bering Sea Sediments As Revealed by 454  
1154 Pyrosequencing. *Frontiers in Microbiology* **8**.

1155 Zopfi, J., T. G. Ferdelman, and H. Fossing. 2004. Distribution and fate of sulfur intermediates—sulfite,  
1156 tetrathionate, thiosulfate, and elemental sulfur—in marine sediments. *In* J. P. Amend, K. J.  
1157 Edwards and T. W. Lyons [eds.], *Sulfur Biogeochemistry - Past and Present*. Geological Society  
1158 of America.

## Acknowledgements

We would like to thank Theo van Alen and Geert Cremers for sequencing the metagenomes. The captain, crew and scientific participants aboard R/V *Lotty* are thanked for their assistance during sampling in August 2015. This work was carried out on the Dutch national e-infrastructure with the support of SURF Cooperative. LABGeM (Genoscope, Institute of Genomics, CEA Sciences) and the National infrastructure “France Génomique” are acknowledged for support within the MicroScope annotation platform. O.R., M.S.M.J. and C.P.S. were supported by NESSC (grant number 024002001), J.F. and M.S.M.J were supported by the SIAM Gravitation Grant on Anaerobic Microbiology (Netherlands Organization for Scientific Research, SIAM 024 002 002) and ERC AG (nr. 339880), C.P.S., W.L. and N.A.G.M.v.H. were supported by NWO (grant number 865.13.005) and the European Union and FORMAS through BONUS COCOA (grant number 2112932-1).

## Figure Legends

**Figure 1:** (a) Locations of sampling sites N10, NB8 and US5B in the Bothnian Sea; (b) Locations of both coastal sites N10 and NB8 in the Öre Estuary in the Bothnian Sea. Figure drawn using Ocean Data View (Schlitzer 2015).

**Figure 2:** Geochemical profiles for sites N10, NB8 and US5B. Porewater profiles of  $\text{SO}_4^{2-}$ , sulfide ( $\sum \text{H}_2\text{S} = \text{H}_2\text{S} + \text{HS}^- + \text{S}^{2-}$ ),  $\text{Fe}^{2+}$ ,  $\text{CH}_4$  and  $\text{NH}_4^+$  are shown. Note the different scales for site N10.

**Figure 3:** Distribution of archaeal taxons based on 16S rRNA amplicon analysis for sediment transects from N10, NB8 and US5B sites in the Bothnian Sea.

**Figure 4:** Distribution of bacterial taxons based on 16S rRNA amplicon analysis for sediment transects from N10, NB8 and US5B sites in the Bothnian Sea.

**Figure 5:** Non-metric multidimensional scaling (nMDS) analysis of sedimentary community populations from sampling sites N10, NB8 and US5B of (a) bacteria and (b) archaea based on 16S rRNA gene amplicon data. A dissimilarity matrix was calculated using the Bray-Curtis dissimilarity index in R. Symbols represent individual sampling depths of each sampling site, colors different sampling sites.

**Figure 6:** Metabolic potential for respiratory sulfur (a) and nitrogen (b) cycle reactions identified in metagenomic bins obtained from the iron-rich methanic sediment at site NB8 in the Bothnian Sea. Key enzymes catalyzing each process are shown. Abbreviations: PRSS, partially reduced sulfur species (include tetrathionate, thiosulfate, sulfite, polysulfide, elemental sulfur); Sdo, sulfur dioxygenase; Sox, sulfur-oxidizing multi-enzyme complex; Apr, adenylylsulfate (APS) reductase; Dsr, dissimilatory (bi)sulfite reductase; Sqr, sulfide:quinone oxidoreductase; Ttr,

1194 tetrathionate reductase; Asr, sulfite reductase; Hyd, sulfhydrogenase; Phs, thiosulfate reductase;  
 1195 Nar, nitrate reductase; Nxr, nitrate:nitrite oxidoreductase; Nap, periplasmic nitrate reductase; Nrf,  
 1196 nitrite reductase ( $\text{NH}_4^+$  forming); Amo, ammonia monooxygenase; Hao, hydroxylamine  
 1197 oxidoreductase; Nos, nitrous oxide reductase; NirK, Cu-containing nitrite reductase (NO  
 1198 forming); NirS, Fe-containing nitrite reductase (NO forming); Nor, nitric oxide reductase.

1199 **Figure 7:** Overview for presence of functional biomarkers in genome bins obtained from the Fe-  
 1200 rich methanic sediment layer at coastal site NB8 in the Bothnian Sea. Analysis was performed for  
 1201 key genes encoding enzymes involved in processes of respiratory nitrogen (N) and sulfur (S)  
 1202 cycles, fermentation product metabolism, autotrophy/acetogenesis and methanogenesis.  
 1203 Abbreviations: Form., formate; But., butyrate; Eth., ethanol; Prop., propionate; WL, Wood-  
 1204 Ljungdahl pathway; CBB, Calvin-Benson-Bessham cycle; rTCA, reverse tricarboxylic acid  
 1205 cycle.

1206 **Figure 8:** Domain distribution (left) and estimation of community diversity (right) in the Fe-rich  
 1207 methanic zone of site NB8 in the Bothnian Sea. Complete 16S rRNA and *mcrA* gene sequences  
 1208 were obtained from the assembled metagenome.

1209 **Figure 9:** Simplified overview of predicted processes involving Fe and sulfur to take place in the  
 1210 analyzed coastal anaerobic sediments in the Bothnian Sea at site NB8. Ferrihydrite would  
 1211 represent the major electron acceptor in the analyzed sediments and be involved in the biotic and  
 1212 abiotic oxidation of sulfide and fermentation products. Anaerobic oxidation of methane could  
 1213 potentially be fueled by the reduction of PRSS formed by ferrihydrite or ferrihydrite directly.  
 1214 Acetate would be one of the key metabolites formed during the primary and secondary

1215 fermentations. The reduced Fe would react with the free sulfide and form insoluble iron sulfides.

1216 Abbreviations: PRSS, partially reduced sulfur species

## 1217 **Tables**

1218 **Table 1:** Characteristics of the investigated sites N10, NB8 and US5B in the Bothnian Sea. The  
 1219 data for water depth, temperature, coordinates, organic carbon content and sedimentation rates  
 1220 were compiled with from Lenstra et al. 2018 and Egger et al. 2015a. Abbreviations: mbss, meters  
 1221 below sea surface.

| Site | Water depth<br>(mbss) | Temperature<br>°C | Latitude<br>°N | Longitude<br>°E | C <sub>org</sub> (wt. %) | Sed. rate (cm<br>year <sup>-1</sup> ) |
|------|-----------------------|-------------------|----------------|-----------------|--------------------------|---------------------------------------|
| N10  | 20.8                  | 7.8               | 63.293         | 19.462          | 3.40 (± 0.70)            | 0.25                                  |
| NB8  | 33.2                  | 6.3               | 63.291         | 19.495          | 3.85 (± 0.07)            | 1                                     |
| US5B | 214                   | 5.0               | 62.351         | 19.581          | 2.58 (± 0.21)            | 1.3                                   |

Figure 1

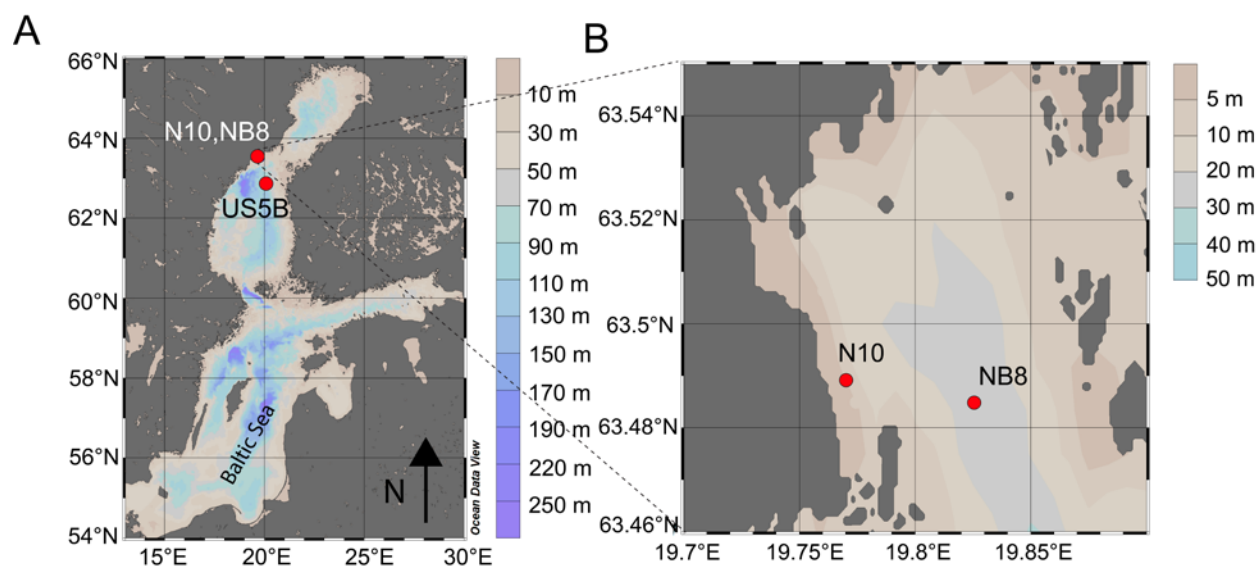

1224 Figure 2

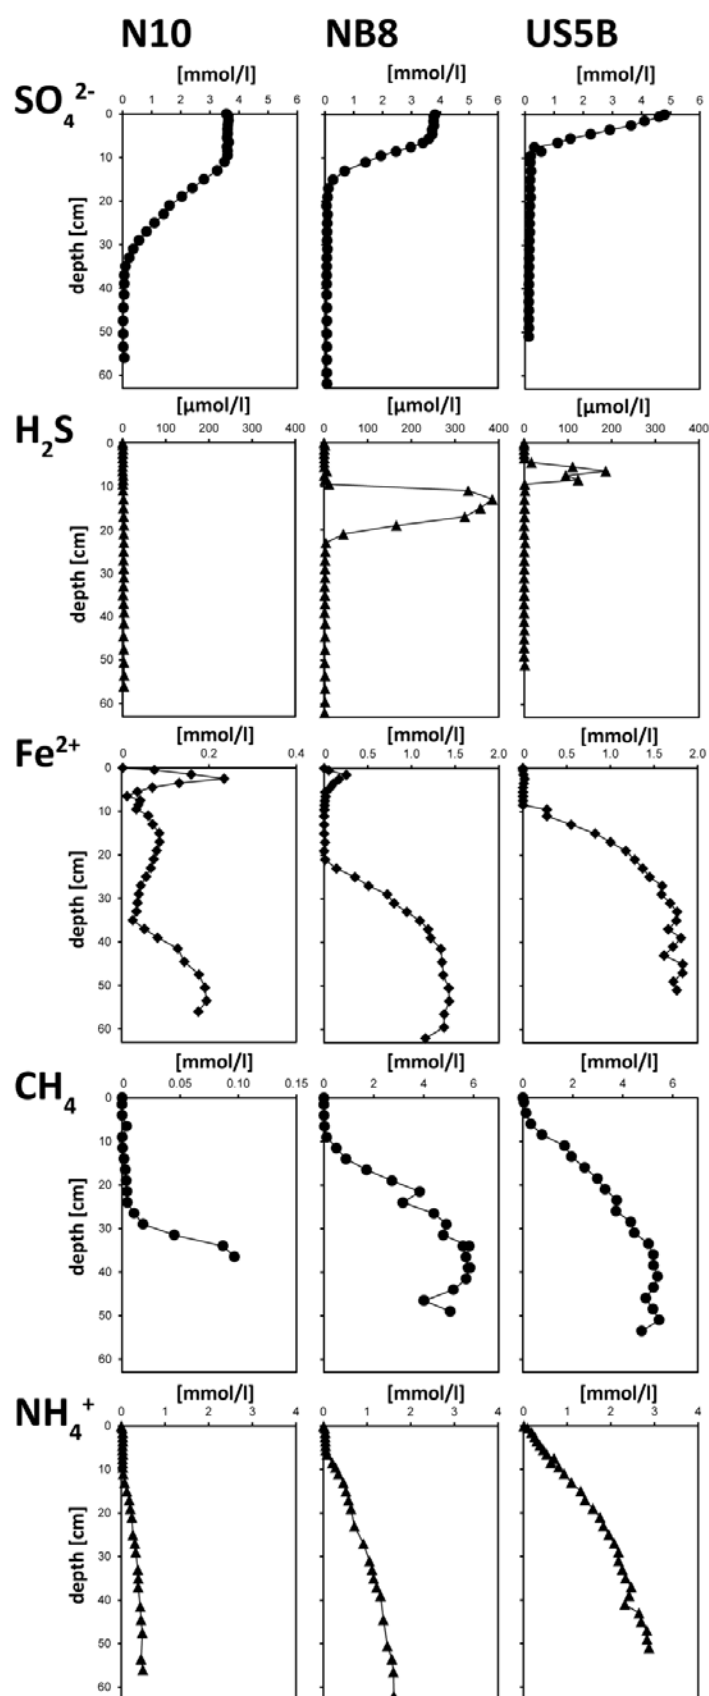

1225 Figure 3

1226

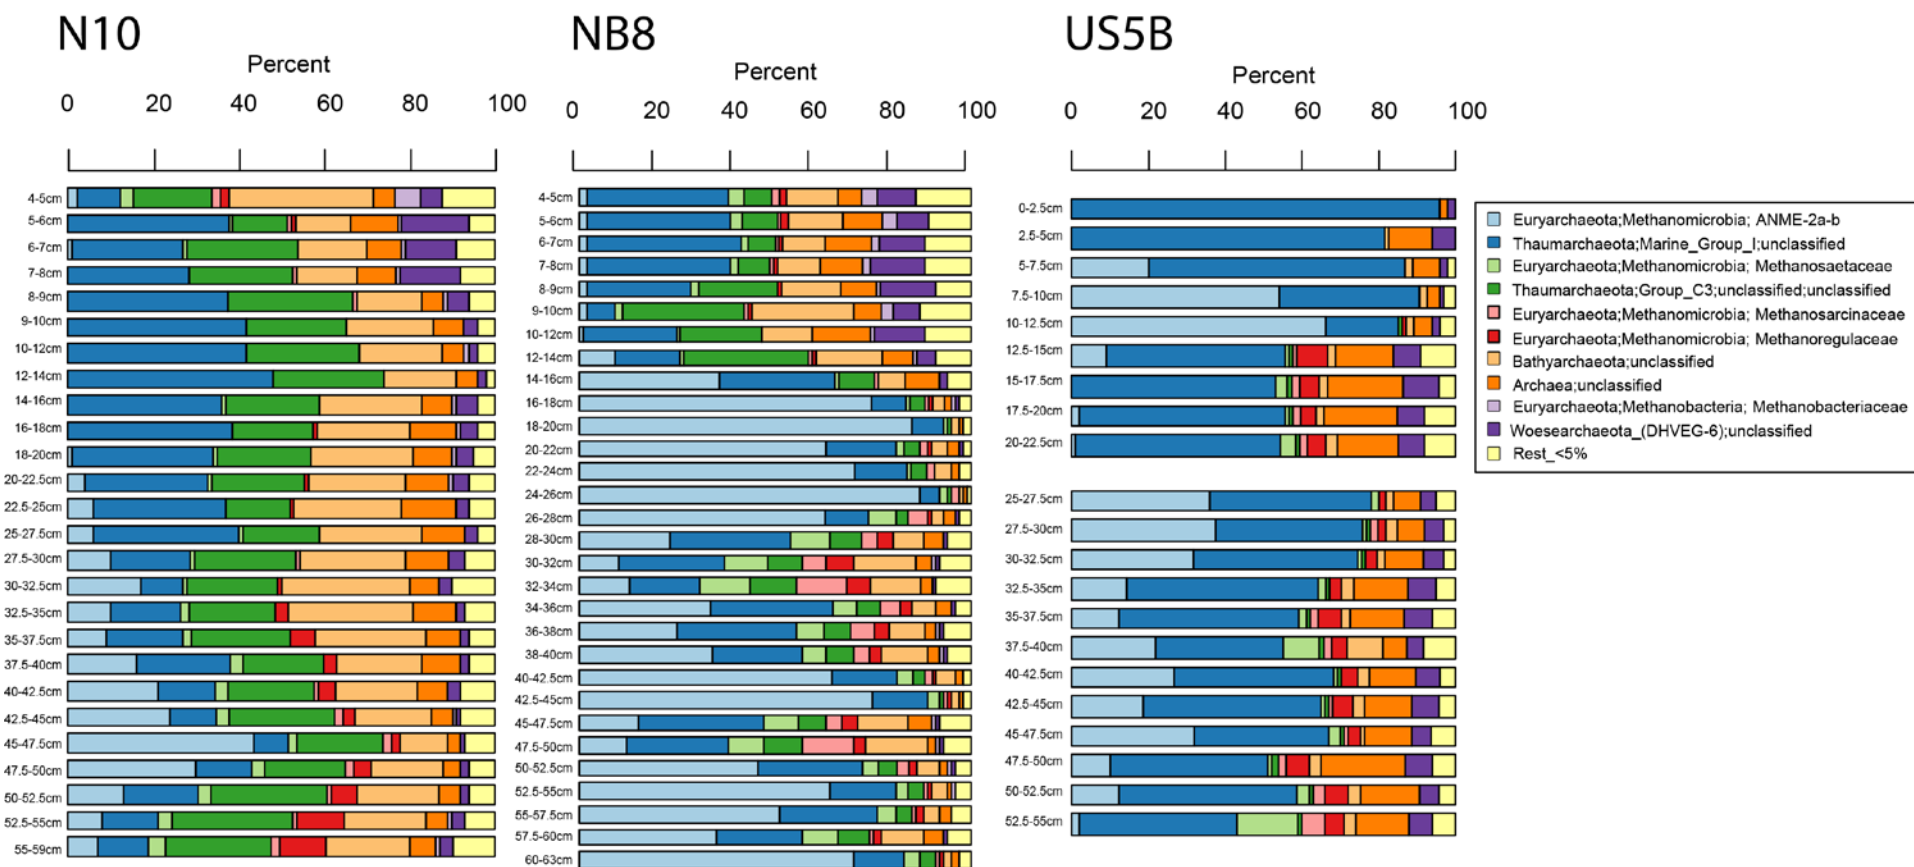

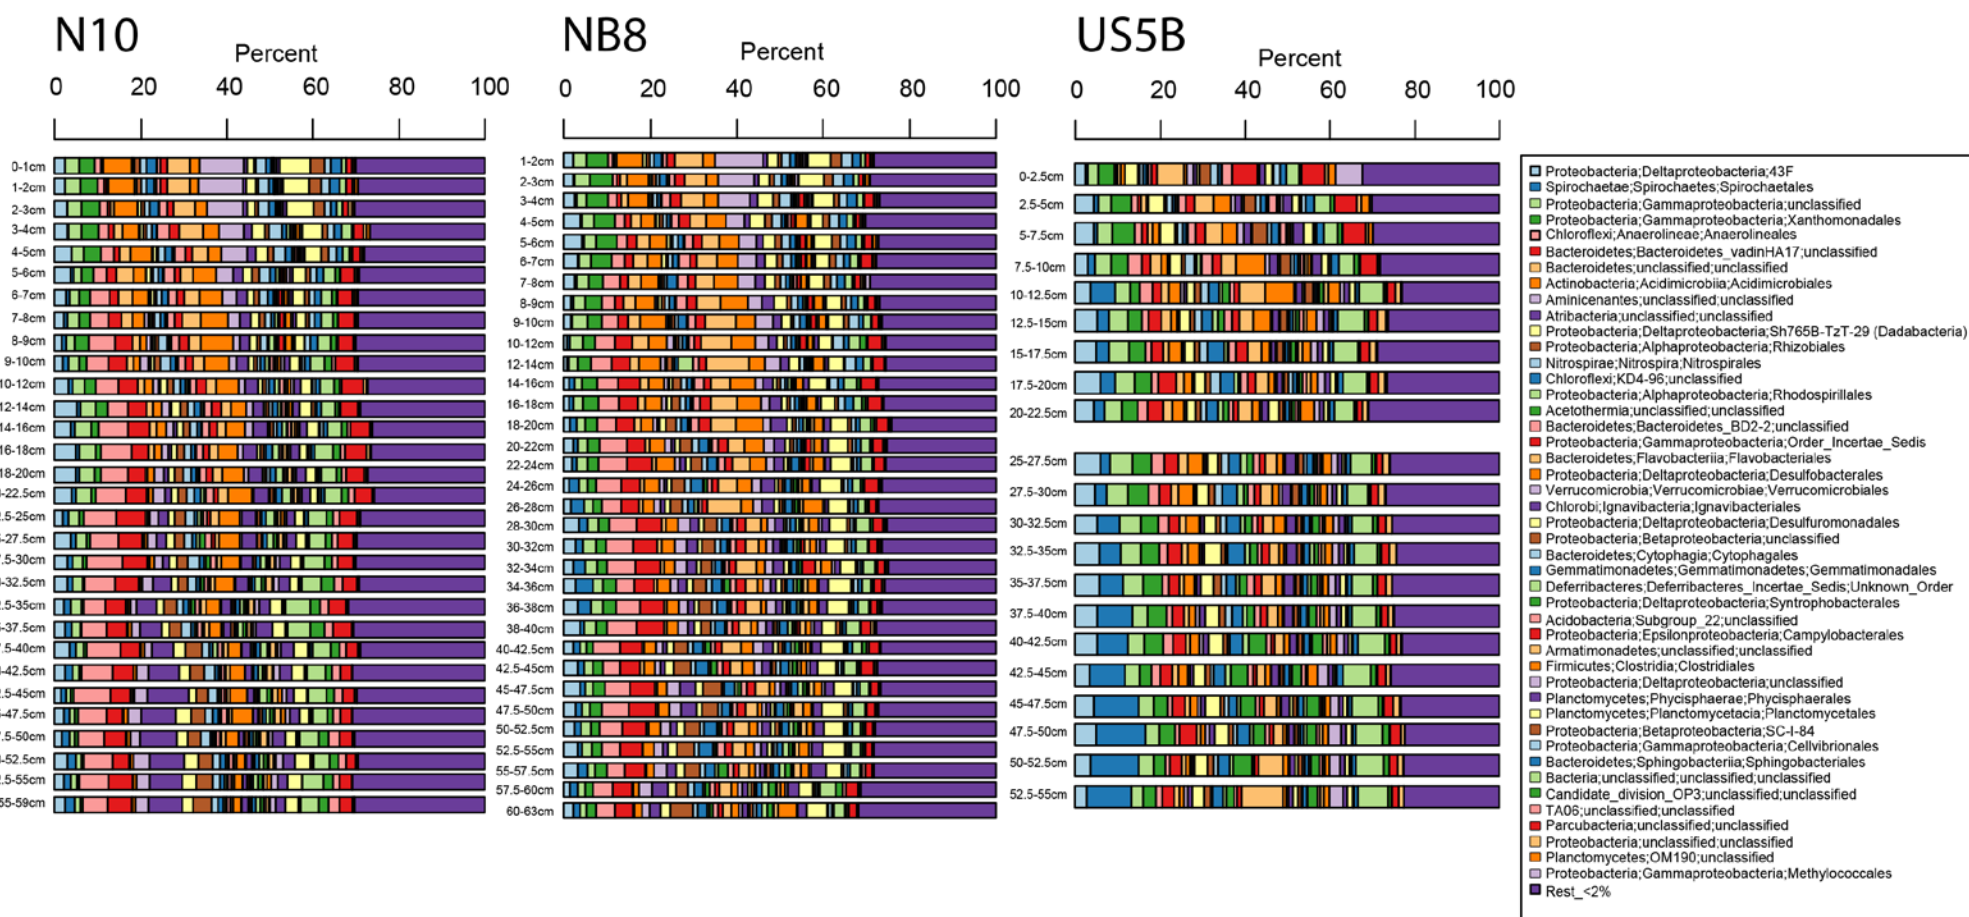

1228 Figure 5

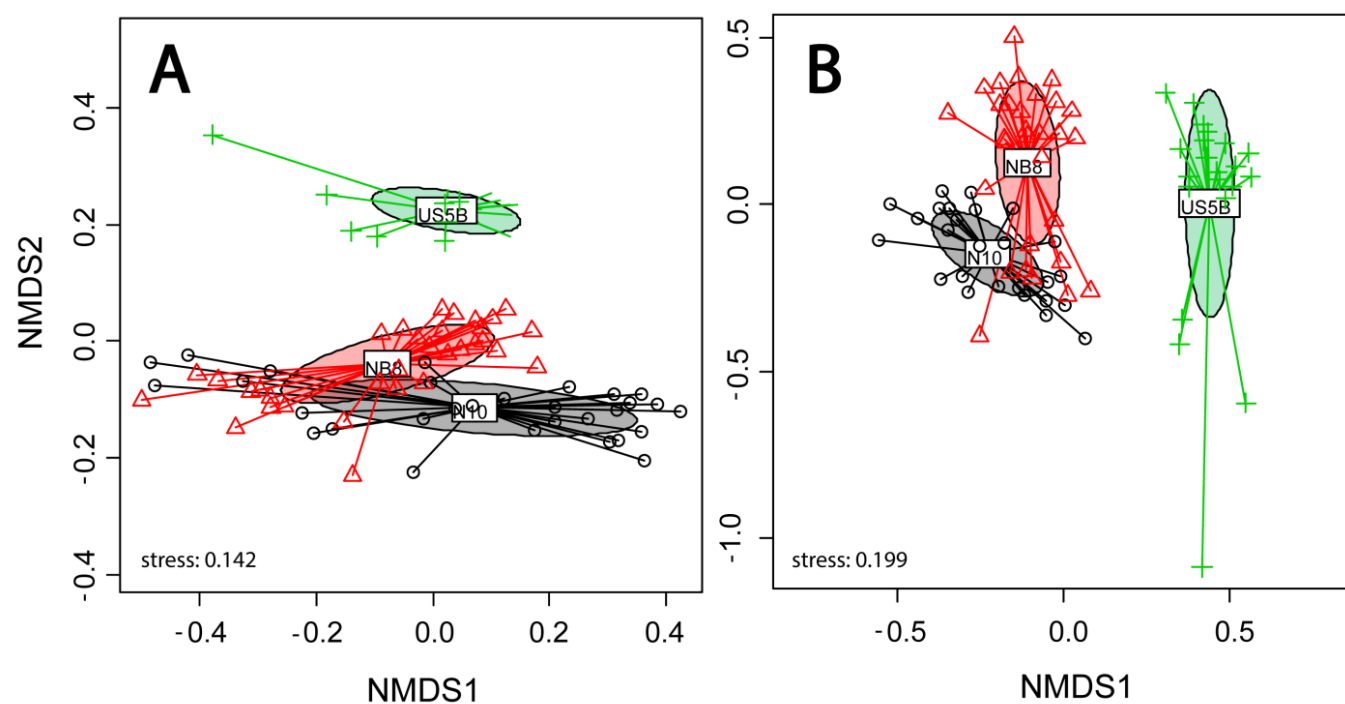

1229 Figure 6

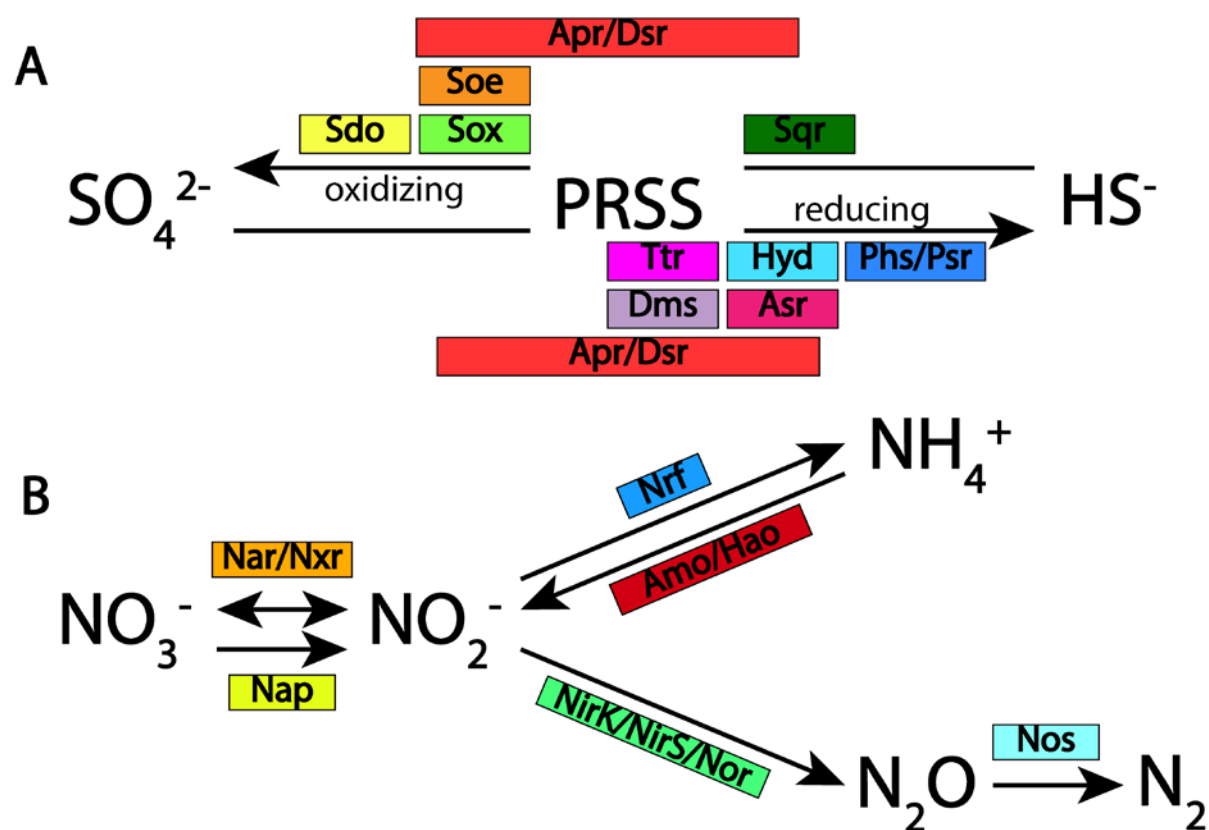

1230

1231 Figure 7

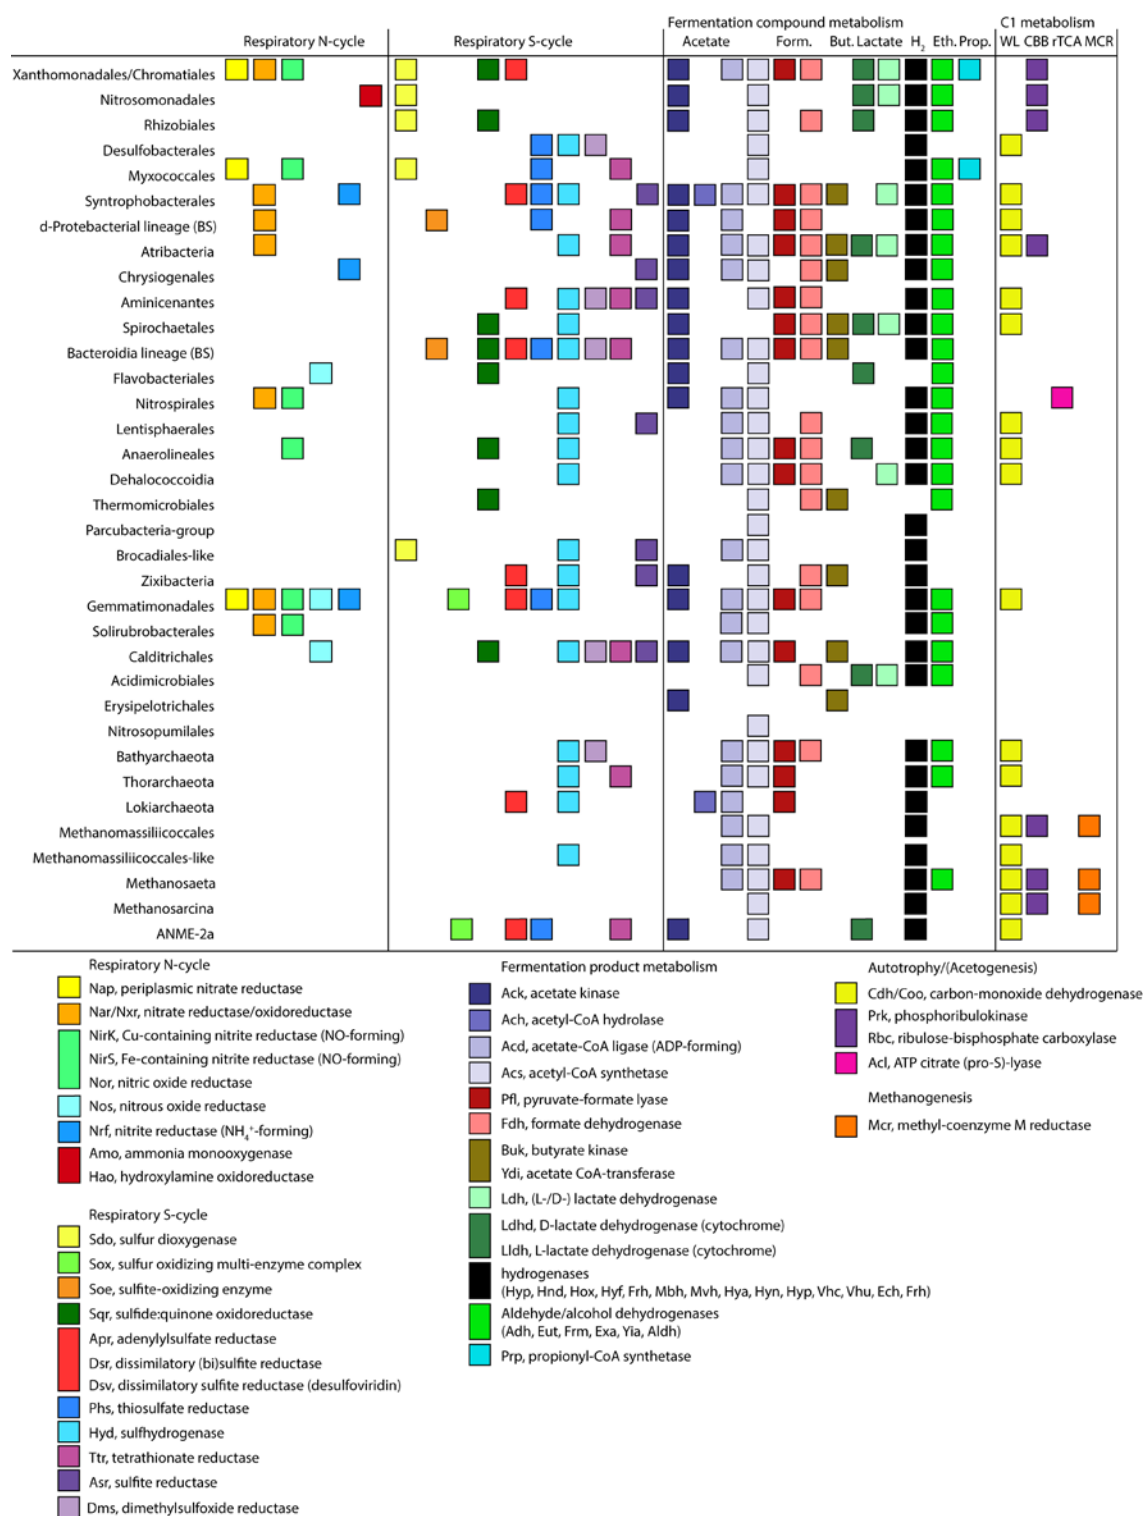

1232

1233     Figure 8

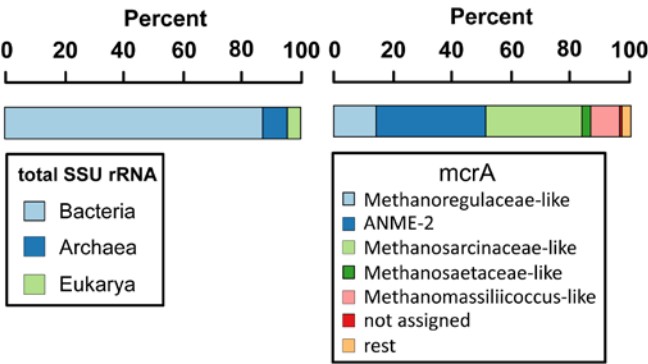

1234

1235 Figure 9

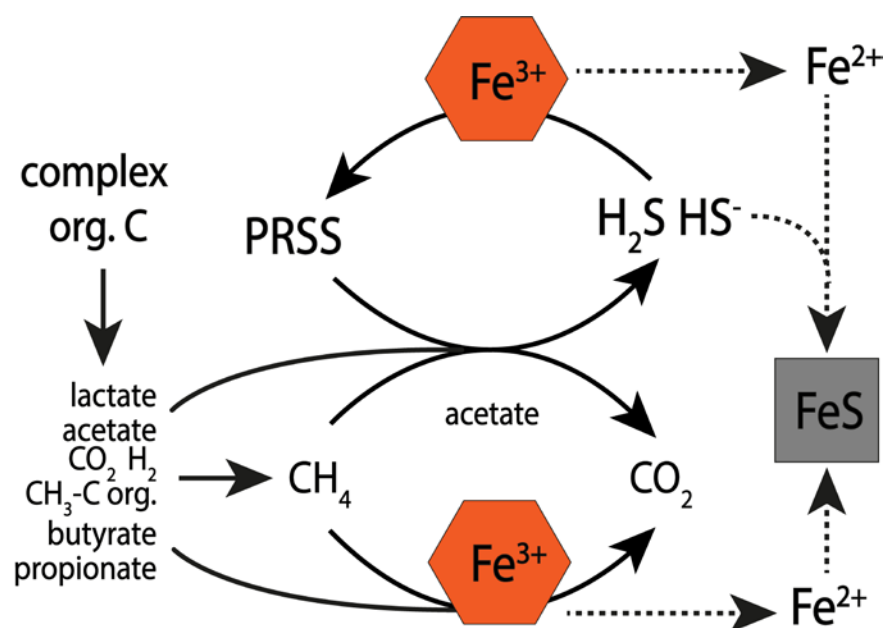

Source: https://www.biorxiv.org/content/10.1101/553131v1.full.pdf
